1 **Discovery of a *Pseudomonas aeruginosa* Type VI secretion system toxin targeting**  
2 **bacterial protein synthesis using a global genomics approach**

3

4 **Laura M. Nolan<sup>1</sup>, Amy K. Cain<sup>2\*</sup>, Eleni Manoli<sup>1</sup>, Maria A. Sainz-Polo<sup>3</sup>, Gordon Dougan<sup>2</sup>,**  
5 **Despoina A.I. Mavridou<sup>1</sup>, David Albesa-Jové<sup>3,4</sup>, Julian Parkhill<sup>2^</sup> and Alain Filloux<sup>1#</sup>**

6

7 <sup>1</sup>MRC Centre for Molecular Bacteriology and Infection (CMBI), Department of Life Sciences,  
8 Imperial College London, London SW7 2AZ, United Kingdom.

9 <sup>2</sup>Wellcome Trust Sanger Institute, Wellcome Trust Genome Campus, Hinxton, Cambridge,  
10 United Kingdom.

11 <sup>3</sup>Structural Biology Unit, CIC bioGUNE, Bizkaia Technology Park, 48160 Derio, Spain.

12 <sup>4</sup>IKERBASQUE, Basque Foundation for Science, Bilbao, Spain.

13 \*Current address: Department of Molecular Sciences, Macquarie University, NSW 2109,  
14 Australia.

15 ^Current address: Department of Veterinary Medicine, University of Cambridge, Cambridge  
16 CB3 0ES, United Kingdom.

17 #Correspondence to Alain Filloux: [a.filloux@imperial.ac.uk](mailto:a.filloux@imperial.ac.uk)

18

19 **SUMMARY**

20           The Type VI secretion system (T6SS) is a bacterial weapon which delivers toxic  
21 effectors to kill competitors or subvert some of their key functions. Here we use transposon  
22 directed insertion-site sequencing (TraDIS) to identify T6SS toxins associated with the H1-  
23 T6SS, one of the three T6SS machines found in *Pseudomonas aeruginosa*. This approach  
24 identified several putative toxin-immunity pairs, including Tse8-Tsi8. Full characterization of  
25 this protein pair demonstrated that Tse8 is delivered by the VgrG1a spike complex into prey  
26 cells where it targets the transamidosome, a multiprotein complex involved in protein synthesis  
27 in bacteria lacking either one or both of the asparagine or glutamine tRNA synthases. Our data  
28 suggests that Tse8 combines as a non-cognate component of the transamidosome complex,  
29 reducing fitness by limiting the ability of the cell to synthesize proteins. This is the first  
30 demonstration of a T6SS toxin affecting protein synthesis, expanding the range of cellular  
31 components targeted by this bacterial weapon. The success of the current study validates the  
32 use of our TraDIS approach as a tool to drastically expand the repertoire of T6SS toxins in any  
33 T6SS-encoding bacterium.

34

35 Bacteria rarely exist in a single-species planktonic state and instead form complex  
36 polymicrobial structures, called biofilms<sup>1,2</sup>. Within this context bacteria often compete with  
37 other microorganisms to secure space and nutrients. The Type VI secretion system (T6SS) is a  
38 Gram-negative bacterial weapon which delivers toxins into neighbouring competitors to either  
39 kill or subvert their key functions in order to attain dominance within a given niche<sup>3-5</sup>. The  
40 T6SS is composed of 13 core components, several of which are structurally related to proteins  
41 from the T4 bacteriophage tail<sup>6</sup>. The Hcp tube-like structure is capped by a VgrG-PAAR tip  
42 complex, or spike, and encapsulated within a TssBC, or VipAB, contractile sheath. Upon  
43 extension of the sheath within the cytoplasm and subsequent contraction, the spike is thought  
44 to facilitate the puncturing of the cell membranes of both the producing and target cells,  
45 allowing delivery of the attached toxins<sup>7,8</sup>. T6SS toxins have been shown to be secreted in  
46 association with the VgrG tip complex, the Hcp tube, or as extension domains of the VgrG,  
47 PAAR or Hcp proteins<sup>9-12</sup>. Importantly, neighbouring bacterial sister cells are protected from  
48 the effects of the toxins by production of cognate immunity proteins, which are usually encoded  
49 adjacent to the toxin gene in the genome<sup>13</sup>. The major identified targets of T6SS toxins to date  
50 are components of the cell wall, as well as the cell membrane and nucleic acids<sup>14</sup>. These T6SS  
51 toxins have mainly been identified by searching in the genomic proximity of known T6SS  
52 components, or by detection of toxins in the secretome<sup>9,12,15</sup>.

53 *Pseudomonas aeruginosa* is a highly antibiotic-resistant Gram-negative pathogen and  
54 ranked second by the World Health Organization in the list of bacteria that require immediate  
55 attention. It is also a highly potent T6SS bacterial killer, equipped with three independent  
56 systems (H1- to H3-T6SS)<sup>16</sup>. In the current study we used a global genomics-based approach  
57 called TraDIS (Transposon directed insertion-site sequencing) to identify novel toxins  
58 associated with the *P. aeruginosa* H1-T6SS. A previous study has used Tn-Seq, a similar global  
59 transposon mutagenesis approach, and confirmed the presence of three T6SS toxin-immunity

60 genes which are located in the vicinity of *vgrG* genes in *V. cholerae*<sup>41</sup>. Our TraDIS approach  
61 identified several remote and novel putative T6SS toxin-immunity pairs. We found that one of  
62 the identified toxins, Tse8 (Type six exported 8), targets the bacterial transamidosome  
63 complex, which is required for protein synthesis in bacteria that lack the asparagine and/or  
64 glutamine tRNA synthases<sup>17</sup>. This is an entirely new target for a T6SS toxin and the first shown  
65 to target bacterial protein synthesis.

66

### 67 **TraDIS identifies known and novel H1-T6SS toxin-immunity pairs**

68 To systematically identify *P. aeruginosa* PAK H1-T6SS associated immunity genes we  
69 generated duplicate high-density insertion transposon mutant libraries consisting of ~2 million  
70 mutants in a H1-T6SS active (PAK $\Delta$ *retS*) and a H1-T6SS inactive (PAK $\Delta$ *retS* $\Delta$ *H1*)  
71 background. We reasoned that transposon insertions in immunity genes would only be tolerated  
72 in the H1-T6SS inactive library, while in the H1-T6SS active library, cells lacking an immunity  
73 protein would be killed upon injection of the cognate toxin from neighbouring sister cells or  
74 due to self-intoxication. Each duplicate library was plated separately at high-contact density on  
75 agar plates and passaged in an overnight incubation step to promote T6SS-mediated killing of  
76 mutants with transposon insertions in immunity genes (Fig. 1). The genomic DNA of mutants  
77 which were not killed in both the H1-T6SS active and inactive libraries were then separately  
78 sequenced using a mass-parallel approach as described previously<sup>18,19</sup> (Fig. 1). The relative  
79 frequencies of transposon insertion in genes in the H1-T6SS active and inactive libraries  
80 revealed a large number of genes which had changes in relative numbers of transposon  
81 insertions. Forty-five genes which had a significantly greater number of normalized transposon  
82 insertions in the H1-T6SS inactive library background, compared to the H1-T6SS active library  
83 background, were identified (Supplementary Table 1), and may encode putative H1-T6SS  
84 immunity proteins. Our approach is validated by our ability to identify five (*tsi1-tsi5*) out of

85 the seven known H1-T6SS immunity genes, whose gene products protect against cognate  
86 toxins acting in both the cytoplasm and periplasm (Table 1). Our screen was unable to identify  
87 *tsi6* as this gene is deleted in our  $\text{PAK}\Delta\text{retS}\Delta\text{HI}$  strain, thus there is no possibility to assess the  
88 relative frequency of transposon insertions in this gene between the two library backgrounds.  
89 In the case of *tsi7* we did not see any difference in the levels of insertions between the two  
90 libraries (Supplementary Table 1). This is probably due to the fact that we also saw insertions  
91 in the PAAR domain of its cognate toxin Tse7 in both library backgrounds. Insertions in the  
92 PAAR domain are expected to destabilise the interaction of Tse7 with VgrG1b which has been  
93 shown to be mediated by the Tse7 PAAR domain<sup>20</sup> abrogating the activity of the toxin in both  
94 the active and inactive libraries.

95 In addition to known H1-T6SS associated immunity genes, our TraDIS approach  
96 identified multiple uncharacterised small coding sequences, which displayed a decrease in  
97 transposon insertions in the H1-T6SS active compared to the inactive background (represented  
98 by a negative log fold change), suggesting a role for these genes in protecting against H1-T6SS  
99 mediated killing (Supplementary Table 1). Upstream of several of these were genes encoding  
100 proteins with putative enzymatic activity which could be T6SS toxins: PAKAF\_04413  
101 (PA0801) encodes a putative M4 peptidase regulator; PAKAF\_02301 (PA2778) encodes a  
102 putative C39 peptidase domain-containing protein; PAKAF\_01705 (PA3272) encodes a  
103 putative nucleoside triphosphate hydrolase; and PAKAF\_00796 (PA4163) encodes a putative  
104 amidase (Table 1 and Extended Data Fig. 1). In the present study, we selected the putative  
105 toxin/immunity pair PAKAF\_00796/PAKAF\_00797 (PA4163/PA4164) for further  
106 characterization, and we refer to it as *tse8-tsi8* (type six exported 8-type six immunity 8) in all  
107 subsequent sections.

108

109

## 110 **Tse8-Tsi8 is a novel toxin-immunity pair**

111 To assess the toxic role of Tse8, a strain lacking *tse8* as well as the downstream putative  
112 immunity gene (*tsi8*) was generated in a PAK $\Delta$ *retS* background, yielding PAK $\Delta$ *retS* $\Delta$ *tsei8*. In  
113 this mutant, expression of *tse8* from pMMB67HE with and without a C-terminal HA tag  
114 affected growth (Fig. 2a). Furthermore, in a competition assay this mutant strain carrying a  
115 *lacZ* reporter gene (recipient PAK $\Delta$ *retS* $\Delta$ *tsei8*::*lacZ*) was outcompeted only by donor strains  
116 having an active H1-T6SS, *i.e.* PAK $\Delta$ *retS* or PAK $\Delta$ *retS* $\Delta$ H2 $\Delta$ H3 (Fig. 2b). The observed  
117 killing of the receiver strain was further demonstrated to be Tse8 dependent in competition  
118 assays with an attacker lacking Tse8 (Extended Data Fig. 2a). The PAK $\Delta$ *retS* strain lacking  
119 either *tsei8* or *tse8* could be complemented in a competition assay by expression of *tsei8* from  
120 pBBR-MCS5 or *tse8* from pBBR-MCS4 (Extended Data Fig. 2b, c).

121 The toxicity associated with the H1-T6SS-dependent delivery of Tse8 into a sensitive  
122 receiver strain could be rescued by expressing the *tsi8* immunity gene from pJN105 in a  
123 competition assay (Fig. 2c) or in a growth assay (Fig. 2d), further confirming the protective  
124 role of Tsi8. In several cases, T6SS immunity proteins have been shown to directly interact  
125 with their cognate toxins<sup>15,21,22</sup>. Here, bacterial-two-hybrid (BTH) assays demonstrate that  
126 indeed Tse8 interacts strongly with Tsi8 (Fig. 2e). In addition, pull-down experiments using  
127 Tsi8-His as a bait, show direct interaction of the two proteins (Fig. 2f); this interaction is  
128 specific to Tsi8 as minimal amounts of Tse8-HA-Strep elute from the pull-down beads in the  
129 absence of Tsi8 or in the presence of the non-specific binding control (CcmE-His) (Extended  
130 Data Fig. 3).

131 T6SS toxin delivery frequently relies on a direct interaction between the toxin and  
132 components of the T6SS spike<sup>9,12</sup>. BTH assays (Fig. 3a), as well as far-western dot blots  
133 revealed that Tse8 interacts strongly with VgrG1a (Fig. 3b). While the interaction of Tse8 with  
134 VgrG1c was significant in the BTH assay (Fig. 3a), no interaction above the non-specific

135 binding control (CcmE-His) was observed in the far-western dot blots (Fig. 3b). Finally, no  
136 interaction between Tse8 and VgrG1b was observed in BTH (Fig. 3a) or far western dot blots  
137 (Fig. 3b).

138 Overall, the above results demonstrate that Tse8-Tsi8 is a novel antibacterial toxin-  
139 immunity pair associated with the H1-T6SS, and that Tse8 interacts with the VgrG1a tip to  
140 facilitate delivery into target cells.

141

### 142 **Tse8 is a predicted amidase family enzyme**

143 Using Phyre2<sup>23</sup> we found that the closest 3D homologs of Tse8 are the  
144 *Stenotrophomonas maltophilia* Peptide amidase (Pam)<sup>24</sup> (sequence identity 29%), the  
145 *Staphylococcus aureus* Gln-tRNA(Gln) transamidosome subunit A (GatA)<sup>25</sup> (sequence identity  
146 20%), the *P. aeruginosa* Asn-tRNA(Asn) transamidosome subunit A (GatA)<sup>26</sup> (sequence  
147 identity 25%), the *Flavobacterium sp.* 6-aminohexanoate cyclic dimer hydrolase (NylA)<sup>27</sup>  
148 (sequence identity 24%), the *Bradyrhizobium japonicum* malonamidase E2 (MAE2)<sup>28</sup>  
149 (sequence identity 25%), the *Pseudomonas sp.* allophanate hydrolase (AtzF)<sup>29</sup> (sequence  
150 identity 30%), and the *Bacterium csbl00001 Aryl Acylamidase* (AAA)<sup>30</sup> (sequence identity  
151 22%). Amino acid sequence analysis indicates that Tse8 contains an Amidase Signature (AS)  
152 domain (Pfam PF01425) distributed between an N-terminal (residues 25-291) and a C-terminal  
153 region (residues 459-544) of its sequence (Extended Data Fig. 4). AS sequences are  
154 characterized by a stretch rich in glycine and serine residues, as well as a highly conserved Ser-  
155 cisSer-Lys catalytic triad<sup>24,25,31-34</sup>. The catalytic Lys is located in the C-terminal end of a  
156 conserved  $\beta$ -strand (region 1) (Extended Data Fig. 4), while the cisSer is located at the C-  
157 terminus of region 2 (Extended Data Fig. 4). Finally, the nucleophilic Ser residue is located in  
158 a highly conserved short loop of region 3. All these AS signature sequence characteristics

159 (underlined by a dashed line in Extended Data Fig. 4) are present in Tse8 and its closest 3D  
160 homologues.

161         Given that Tse8 possesses the conserved catalytic features of amidase family enzymes  
162 (Extended Data Fig. 4), we tested whether it has amidase activity. Tse8 was purified and  
163 confirmed to be intact (Extended Data Fig. 5). Subsequently, its capacity to hydrolyze carbon-  
164 nitrogen bonds was tested on two molecules, epinecidin-1 and glutamine which are substrates  
165 for Pam from *S. maltophilia* and GatA of the transamidosome, respectively. The amidase  
166 activities of Pam and Tse8 were analyzed by Mass Spectrometry (MS) by monitoring the  
167 modifications of epinecidin-1 in the presence and absence of the tested proteins and of the  
168 small nucleophile hydroxylamine (Extended Data Fig. 6). While the C-terminus of epinecidin-  
169 1 was deaminidated in the presence of Pam (Extended Data Fig. 6b), it remained amidated in  
170 the presence of Tse8, suggesting that Tse8 has no amidase activity on this substrate (Extended  
171 Data Fig. 6a). The amidase activity of Tse8 was also tested on the GatA substrate glutamine  
172 (Extended Data Fig. 7) and no modification was detected by MS (Extended Data Fig. 7b. In  
173 addition, whole-cell glutaminase assays were performed and the amidase activity of *E. coli*  
174 whole cell lysates expressing GatA or Tse8 on L-glutamine was determined by monitoring the  
175 accumulation of NADPH. These experiments demonstrated that while GatA expressed from  
176 plasmid pET41a had a significant amount of amidase activity, whole cells expressing Tse8  
177 from the same vector produced a level of NADPH which was not significantly different to the  
178 empty vector-carrying control strain (Extended Data Fig. 7c). Overall these data demonstrate  
179 that the substrates for Pam and GatA are not substrates for Tse8, suggesting that Tse8 is highly  
180 specific or unlikely to utilize amidase activity to elicit toxicity.

181         To assess whether Tse8 toxicity is mediated through amidase activity *in vivo*, we  
182 replaced the *tse8* gene in the chromosome by an allele encoding a putative catalytic site mutant  
183 of Tse8 with a Ser186Ala (S186A) substitution. This conserved Ser186 residue (Extended Data



184 Fig. 4) acts as the catalytic nucleophile in homologous amidases, and is necessary for  
185 enzymatic function<sup>35</sup>. PAK $\Delta$ *retS* and PAK $\Delta$ *retS* $\Delta$ H1 donor strains encoding either wild-type  
186 Tse8 or Tse8S186A were competed against the recipient strain PAK $\Delta$ *retS* $\Delta$ *tsei8::lacZ*. This  
187 showed that there was no difference in the recovered CFUs/mL of the recipient when the  
188 attacking strain delivered either wild-type Tse8 or Tse8S186A (Fig. 3c), further suggesting that  
189 Tse8 does not utilize amidase activity to elicit toxicity *in vivo*.

190

### 191 **Tse8 elicits toxicity by interacting with the bacterial amidotransferase complex**

192 Since Tse8 toxicity does not appear to depend on it having amidase activity (Fig. 3c),  
193 we hypothesized that Tse8 could instead be eliciting toxicity by competing with a functional  
194 amidase either within the cell, or within a complex in the cell. Two 3D homologues of Tse8  
195 are the A subunit of the *S. aureus* Gln-tRNA(Gln) transamidosome and the *P. aeruginosa* Asn-  
196 tRNA(Asn) transamidosome. Each of these are the A subunit of the transamidosome complex,  
197 which are used by bacteria that lack the cognate tRNA synthases for asparagine (Asn) and/or  
198 glutamine (Gln)<sup>17</sup>. These bacteria utilize a two-step pathway instead, whereby a non-  
199 discriminating tRNA synthase generates a misacetylated aspartate- or glutamate-loaded tRNA  
200 which is then transaminated by the heterotrimeric amidotransferase enzyme GatCAB, within  
201 the transamidosome complex, to leave asparagine or glutamine correctly loaded onto their  
202 cognate tRNA. Given that not all bacteria rely on the transamidosome for protein synthesis, we  
203 reasoned that if Tse8 toxicity is directed at this enzymatic complex then expression of Tse8  
204 should only be toxic in bacteria which use the transamidosome. *P. aeruginosa* relies on the  
205 transamidosome for Asn-tRNA synthesis<sup>36</sup> and we see a growth defect when Tse8 is expressed  
206 on a plasmid or delivered into a strain lacking Tsi8 (Fig. 2a-d). *Agrobacterium tumefaciens*  
207 lacks both Asn-tRNA and Gln-tRNA synthases and generates these cognate tRNAs through  
208 the transamidosome (Supplementary Table 2), while *E. coli* possesses both the Asn- and Gln-

209 tRNA synthases and does not have a transamidosome complex (Supplementary Table 2). The  
210 effect of Tse8 expression was examined and a growth defect was observed for *A. tumefaciens*,  
211 which could be rescued by coexpression of Tsi8 (Fig. 3d), but no growth defect was observed  
212 for *E. coli* (Fig. 3e) despite Tse8 expression at high levels from pET28a (Fig. 3f). Taken  
213 together these data suggest that Tse8 toxicity depends on the presence of the transamidosome.

214 A structural homology model of Tse8 was generated based on the solved *S. aureus*  
215 GatA 3D structure (PDB: 2F2A). Overlaying the Tse8 homology model with the A subunit of  
216 the solved *P. aeruginosa* transamidosome structure (PDB: 4WJ3) (Extended Data Fig. 8a)  
217 shows that Tse8 likely shares a high level of structural similarity to the A subunit of the  
218 complex. Inspection of the homologous residues within the substrate binding pockets of  
219 *SaGatA* versus *PaTse8* revealed that while the catalytic triad residues are conserved, the  
220 substrate binding residues (Tyr309, Arg358 and Asp425 in *SaGatA*)<sup>24</sup> are not (Extended Data  
221 Fig. 8b), supporting the claim that Tse8 does not have the same substrate as GatA (Extended  
222 Data Fig. 7). Given the high level of predicted structural similarity between GatA and Tse8 we  
223 hypothesized that Tse8 may be able to interact with the transamidosome and could be eliciting  
224 toxicity by altering the functionality of this complex. To investigate this, we performed a pull-  
225 down experiment using purified proteins. GatCAB was purified as a complex using a Ni-  
226 affinity column through histidine-tagged GatB (His-GatB); GatA and GatC also had tags which  
227 were appropriate for their detection by western blot (GatA-V5 and GatC-HA). Tse8 was  
228 purified separately through a StrepII tag (Tse8-HA-Strep). GatCAB was pulled down in the  
229 presence and absence of a 15-fold molar excess of Tse8 via His-GatB on His-Tag Dynabeads.  
230 Tse8 was found to copurify with GatCAB (lane 3, Fig. 4a) and, when present, the amount of  
231 pulled GatA decreased accordingly (compare the amounts of GatA in lanes 2 and 3, Fig. 4a);  
232 the amounts of pulled GatB and GatC did not decrease in the presence of Tse8. This interaction  
233 is specific to GatCAB as minimal amounts of Tse8 elute from the pull-down beads in the

234 absence of the transamidosome or in the presence of the non-specific binding control (CcmE-  
235 His) (Extended Data Fig. 3). This is further supported by the fact that Tse8 interacts strongly  
236 with GatB and GatC in far Western dot blots, but not with GatA or the binding control CcmE  
237 (Fig. 4b).

238 The structure of the *P. aeruginosa* GatCAB transamidosome reveals it to be a  
239 symmetric complex comprising ND-AspRS, GatCAB, and tRNA<sup>Asn</sup> in a 2:2:2 stoichiometry<sup>26</sup>  
240 (as represented in Extended Data Fig. 8a). Given that Tse8 interacts with the GatCAB complex  
241 (Fig. 4a) and specifically with GatB and GatC, but not GatA (Fig. 4b), it could be taking the  
242 place of at least one monomer of GatA within one dimer of the GatCAB complex. As Tse8  
243 does not act on the same substrate as GatA *in vitro* (Extended Data Fig. 7), the presence of  
244 Tse8 within the complex would reduce the production of Asn-tRNA<sup>Asn</sup> available for use in  
245 protein synthesis. To investigate the effect of Tse8 expression on protein synthesis *in vivo* we  
246 utilized an unstable Gfp variant (Gfp-AGA) which is expressed from the Tn7 site of the *P.*  
247 *aeruginosa* chromosome<sup>37</sup> in a Tse8-sensitive strain (PAK $\Delta$ retS $\Delta$ tsei8) that also expressed  
248 Tse8 or the empty pMMB67HE vector. This showed that the levels of Gfp were 30 % lower in  
249 the strain expressing Tse8 compared to the empty vector control (Fig. 4c), suggesting that this  
250 strain is less able produce the unstable Gfp variant, and thus less cellular protein in general.  
251 Given this, we hypothesized that if we were able to override the need for the transamidosome  
252 by providing the bacterium with the tRNA synthase it lacked, we would be able to rescue the  
253 observed growth defect when Tse8 is either expressed from a plasmid (Fig. 2a,d) or delivered  
254 by an attacker (Fig. 2b,c). *P. aeruginosa* only lacks the asparagine tRNA synthase<sup>36</sup> (and  
255 Supplementary Table 2), thus in this case Tse8 toxicity should be rescued by simply providing  
256 the cell with this tRNA synthase. To investigate this the Asn-tRNA synthase (*asnS*) from *E.*  
257 *coli* was expressed in PAK $\Delta$ retS $\Delta$ tsei8 from pJN105, and the strain competed against  
258 PAK $\Delta$ retS and PAK $\Delta$ retS $\Delta$ HI. This revealed that expression of AsnS was able to rescue Tse8

259 toxicity (Fig. 4d) to the same extent as expression of the cognate immunity protein, Tsi8 (Fig.  
260 2c).

261

## 262 **Discussion**

263 In the current study we demonstrate that our global genomic approach can be used to  
264 identify T6SS toxin-immunity pairs associated with the H1-T6SS of *P. aeruginosa*. Our  
265 approach not only confirmed previously characterized *P. aeruginosa* T6SS toxin-immunity  
266 pairs, but also revealed several putative novel toxin-immunity pairs, including Tse8-Tsi8,  
267 which would probably not have been found using targeted approaches or bioinformatics.  
268 Characterization of the Tse8-Tsi8 pair, revealed that Tsi8 is the cognate immunity protein for  
269 the Tse8 toxin, and that Tse8 interacts with VgrG1a, hence it is likely delivered into target cells  
270 *via* the VgrG1a-tip complex.

271 Tse8 was also found to interact with GatCAB of the bacterial transamidosome complex,  
272 which is required for protein synthesis in certain bacteria that lack one or both of the asparagine  
273 or glutamine tRNA synthases<sup>17</sup>. Our far Western dot blots (Fig. 4b) and pull-down data (Fig.  
274 4a) demonstrate that Tse8 interacts specifically with the GatB and GatC components of the  
275 amidotransferase complex, with this interaction likely being mediated by replacement of GatA  
276 by Tse8. Nonetheless, the large molar excess required for the pull-down experiments (Fig. 4a)  
277 suggests that *in vivo* Tse8 is more likely to interact with transamidosome components as the  
278 GatCAB complex assembles *de novo*, rather than displace GatA on already formed  
279 transamidosome complexes. Based on this, we propose that Tse8 combines with GatB and  
280 GatC as a non-cognate component of the transamidosome complex and that in bacteria where  
281 the transamidosome is essential (*i.e.* in bacteria lacking one or both of the Asn- or Gln-tRNA  
282 synthases), the formation of such a complex results in reduced fitness due to decreased levels  
283 of protein synthesis. In agreement with this, Tse8 toxicity can be rescued if the transamidosome

284 function is bypassed upon provision of the transamidosome-independent tRNA-synthase  
285 lacked by the bacterium (*e.g.* AsnS for *P. aeruginosa* (Fig. 4d)). Thus, Tse8 is the first identified  
286 T6SS toxin to target a cellular component involved in protein synthesis.

287 Future work will focus on further characterization of the specifics of the Tse8-GatCAB  
288 interaction. This could point to ways of inhibiting the transamidosome and could provide a  
289 basis for the development of antibacterial agents against this target. Moreover, investigation of  
290 the other putative toxins detected in this study could also open new therapeutic avenues;  
291 elucidation of the substrates of these putative toxins could offer insights into pathways that are  
292 naturally validated antibacterial targets against *P. aeruginosa*. In looking beyond the T6SS of  
293 *P. aeruginosa*, there is a large number of Gram-negative bacteria which infect human and  
294 animal hosts, or are plant pathogens or plant-associated organisms and possess at least one, if  
295 not multiple T6SSs clusters<sup>38-42</sup>. Furthermore, in several cases it has been demonstrated that  
296 distinct T6SS machines deliver a specific subset of toxins into target cells, often under certain  
297 conditions<sup>9,12,16</sup>, suggesting that toxins are not only bacterial specific, but potentially even niche  
298 specific. Given this diversity, we predict that our TraDIS approach could be useful for  
299 drastically expanding the repertoire of known T6SS toxins across a range of bacteria and  
300 ecologically or clinically relevant growth environments.

301

## 302 **Methods**

### 303 **Bacterial strains, plasmids and growth conditions**

304 Bacterial strains and plasmids used in this study are reported in Extended Table 1. *P.*  
305 *aeruginosa* PAK was used for TraDIS library generation and subsequent assays using mutant  
306 strains generated by allelic exchange mutagenesis as described previously<sup>43,44</sup>. *P. aeruginosa*  
307 strains were grown in tryptone soy broth (TSB), Lysogeny Broth (LB) or M9 or MOPs minimal  
308 media (with indicated supplements) with antibiotics as appropriate (streptomycin 2000 µg/mL,

309 carbenicillin 100 µg/mL, gentamicin 50 µg/mL) at 37 °C with agitation. *E. coli* strains DH5α,  
310 SM10, CC118λ*pir* and BL21(DE3) were used for cloning, conjugation and protein expression  
311 steps. *E. coli* cells were grown in TSB, LB, Terrific Broth or M9 minimal media (with indicated  
312 supplements) (streptomycin 50 µg/mL, ampicillin 100 µg/mL, kanamycin 50 µg/mL) at 37 °C  
313 with agitation. *A. tumefaciens* C58 was grown in LB or M9 minimal media (with indicated  
314 supplements) with antibiotics as appropriate (gentamicin 50 µg/mL, spectinomycin 100  
315 µg/mL) at 30 °C with agitation.

### 316 **DNA manipulation**

317 DNA isolation was performed using the PureLink Genomic DNA mini kit (Life  
318 Technologies) except for TraDIS library genomic DNA isolation (see below). Isolation of  
319 plasmid DNA was carried out using the QIAprep spin miniprep kit (Qiagen). Primers (Sigma)  
320 used are shown in Extended Table 2. DNA fragments were amplified with either KOD Hot  
321 Start DNA Polymerase (Novagen) or standard Taq polymerase (NEB) as described by the  
322 manufacturer, with the inclusion of Betaine (Sigma) or DMSO (Sigma). Restriction  
323 endonucleases (Roche) were used according to the manufacturer's specifications. DNA  
324 sequencing was performed by GATC Biotech.

### 325 **TraDIS library generation**

326 A highly saturated transposon mutant library was generated in *P. aeruginosa* PAKΔ*retS*  
327 or PAKΔ*retS*ΔH1 strains by large scale conjugation with an *E. coli* SM10 [pBT20] donor  
328 which allowed for random insertion of a mariner transposon throughout the genome and  
329 conferred gentamicin resistance in the recipient PAK strain. See Supplementary Information  
330 for detailed protocol on the generation of the transposon mutant libraries.

### 331 **TraDIS library assay**

332 Glycerol stocks of harvested PAKΔ*retS* or PAKΔ*retS*ΔH1 TraDIS libraries were  
333 combined at normalized cell density for each separate replicate and spread onto large square

334 (225 mm) VBM agar plates supplemented with gentamicin (60 µg/mL) and incubated for 16  
335 hrs at 37 °C. Cells were then harvested into 5 mL LB and pelleted by centrifugation (10,000 g,  
336 15 mins, 4 °C). Cell pellets were resuspended in 1.4 mL LB and 1 mL was taken for subsequent  
337 genomic DNA extraction (see below).

### 338 **TraDIS library genomic DNA extractions**

339 Genomic DNA from the harvested pooled library pellets were resuspended in 1.2 mL  
340 lysis solution (10 mM Tris-HCl, 400 mM NaCl and 2 mM Na<sub>2</sub>EDTA, supplemented with  
341 Proteinase K in storage buffer (50 mM Tris-HCl, 50% (v/v) glycerol, 100 mM NaCl, 0.1 mM  
342 EDTA, 10mM CaCl<sub>2</sub>, 0.1% (v/v) Triton X-100 and 1 mM DTT) to a concentration of 166  
343 µg/mL. Cell lysis was achieved by incubation at 65 °C for 1 hr, with occasional vortexing. The  
344 samples were then cooled to room temperature and RNA removed by addition of RNase A (5  
345 µg/mL) and incubation at 37 °C for 80 mins. Samples were then placed on ice for 5 mins. Each  
346 lysate was then split into 2 eppendorf tubes at ~600 µL per tube, and 500 µL NaCl (5 M) were  
347 added to each tube. Cell debris were removed by centrifugation (10,000 g, 10 mins, 4 °C) and  
348 500 µL from each tube was added to 2 volumes of isopropanol to precipitate the DNA. DNA  
349 was then collected by centrifugation (10,000 g, 10 mins, 4 °C), and DNA pellets were washed  
350 twice in 70% (v/v) ethanol. The fully dried DNA pellet was finally resuspended in Tris-EDTA  
351 buffer.

### 352 **PAK reference genome**

353 The PAK genome under the NCBI number accession number LR657304, also listed in  
354 the European Nucleotide Archive (ENA) under accession number ERS195106, was used. See  
355 details in Cain *et. al.* (2019) *Microbiology Resource Announcement* (submitted 24<sup>th</sup> July, 2019).

### 356 **Generation of TraDIS sequencing libraries, sequencing and downstream analysis**

357 TraDIS sequencing was performed using the method described previously<sup>19</sup>, with some  
358 minor modifications for this study. See Supplementary Information for full details.



## 359 **Bacterial growth assays**

360 Growth assays were performed as follows. For Fig. 2a, overnight cultures of  
361 PAK $\Delta retS\Delta tsei8$  were diluted down to OD<sub>600</sub> = 0.1 in M9 minimal media (with supplements  
362 MgSO<sub>4</sub> (2 mM), CaCl<sub>2</sub> (0.1 mM), glucose (0.4% (w/v)) and FeSO<sub>4</sub>·7H<sub>2</sub>O (0.01 mM)), and  
363 grown shaking at 37 °C. Expression of Tse8 was induced with IPTG (1 mM) at 4 hrs. For Fig  
364 2d, PAK $\Delta retS\Delta tsei8$  cells carrying both pJN105 and pMMB67HE plasmids (+/- Tsi8/Tse8)  
365 were grown in MOPS minimal media (MOPS (40mM, pH 7.5), Tricine (4 mM, pH 7.5),  
366 NH<sub>4</sub>CL (9.52 mM), CaCl<sub>2</sub> (0.5 uM), MgCl<sub>2</sub>·7H<sub>2</sub>O (0.52 mM), NaCl (50 mM), FeSO<sub>4</sub>·7H<sub>2</sub>O 20  
367 mM (0.01 mM), K<sub>2</sub>HPO<sub>4</sub> (1.32 mM) supplemented with 1x micronutrient mix (100x:  
368 Ammonium molybdate tetrahydrate (3 uM), Boric acid (400 uM), Cobalt chloride (30 uM),  
369 Cupric sulphate (10 uM), Manganese chloride (80 uM), Zinc sulphate (10 uM) and Nickel  
370 chloride hexahydrate (0.1% (w/v/)) and glucose (0.4% (w/v)) and L-Glutamine (0.05% (w/v))  
371 without antibiotics shaking at 37 °C. Expression of Tse8 was induced with IPTG (1 mM) and  
372 Tsi8 with arabinose (0.2% (w/v)) at 5 hrs. For Fig. 3d, overnight cultures of *A. tumefaciens*  
373 with pTrc200/pJN105 plasmids (+/- Tse8/Tsi8) were diluted down to OD<sub>600</sub> = 0.1 in MOPs  
374 media as above without antibiotics and grown shaking at 30 °C. Expression of Tse8 was  
375 induced with IPTG (1 mM) and Tsi8 with arabinose (0.2% (w/v)) at 8 hrs. For Fig. 3e,  
376 overnight cultures of *E. coli* were diluted down to OD<sub>600</sub> = 0.1 in M9 minimal media (with  
377 supplements MgSO<sub>4</sub> (2 mM), CaCl<sub>2</sub> (0.1 mM), FeSO<sub>4</sub>·7H<sub>2</sub>O (0.01 mM) and glucose (0.4%  
378 (w/v)) and grown shaking at 37 °C. Tse8 expression was induced by addition of IPTG (1 mM)  
379 after 2 hrs.

## 380 **T6SS competition assays**

381 T6SS competition assays were performed as described previously<sup>45</sup> with modifications  
382 as indicated. Briefly, overnight cultures of donor and recipient bacteria alone or in a 1:1 ratio  
383 were combined and spot plated on LB agar plates for 5 hrs at 37 °C and recovered in serial



384 dilution on LB agar plates supplemented with Xgal (5-bromo-4-chloro-3-indolyl- $\beta$ -D-  
385 galactopyranoside) (100  $\mu$ g/mL) to differentiate recipient (PAK $\Delta$ retS $\Delta$ tsei8::lacZ seen as blue)  
386 from donor (white). For recovery of competition assays between donor and recipient  
387 PAK $\Delta$ retS $\Delta$ tsei8 [pBBR1-MCS5] and [pBBR1:tsei8], the competition assay was plated onto  
388 LB agar plates with gentamicin (50  $\mu$ g/mL) to differentiate donor from recipient (Gm<sup>R</sup>). For  
389 recovery of competition assays between donor and recipient PAK $\Delta$ retS $\Delta$ tsei8 [pBBR1-MCS4]  
390 and [pBBR4:tse8], the competition assay was plated onto LB agar plates with carbenicillin (50  
391  $\mu$ g/mL) to differentiate donor from recipient (Carb<sup>R</sup>). In other cases, expression of Tsi8 or AsnS  
392 in the recipient strains was induced in the overnight cultures by addition of arabinose (0.2%  
393 (w/v)). These overnight cultures of donor and induced recipient alone or in a 1:1 ratio were  
394 combined and spot plated onto LB agar supplemented with arabinose (1% (w/v)) for induction  
395 of Tsi8-V5 or AsnS-His for 5 hrs, with the competition assay finally being recovered on LB  
396 agar plates supplemented with gentamycin (50  $\mu$ g/mL) and arabinose (1% (w/v)).

### 397 **Bacterial Two Hybrid (BTH) assays**

398 Protein-protein interactions were analysed using the BTH system as described  
399 previously<sup>46</sup>. Briefly, the DNA region encoding the protein of interest were amplified by PCR  
400 and were then cloned into plasmids pKT25 and pUT18C, which each encode for  
401 complementary fragments of the adenylate cyclase enzyme, as previously described<sup>46</sup> resulting  
402 in N-terminal fusions of T25/T18 from the adenylate cyclase to the protein of interest.  
403 Recombinant pKT25 and pUT18c plasmids were simultaneously used to transform the *E. coli*  
404 DHM1 strain, which lacks adenylate cyclase, and transformants were spotted onto Xgal (40  
405  $\mu$ g/mL) LB agar plates supplemented with IPTG (1 mM), Km (50  $\mu$ g/mL) and Amp (100  
406  $\mu$ g/mL). Positive interactants were identified after incubation at 30 °C for 48 hrs. The positive  
407 controls used in the study were pUT18C or pKT25 derivatives encoding the leucine zipper  
408 from GCN4, which forms a dimer under the assay conditions.

## 409 **$\beta$ -Galactosidase assay**

410 The strength of the interactions in the BTH assays was quantified from the  $\beta$ -  
411 galactosidase activity of co-transformants scraped from Xgal plates and measured as described  
412 previously; activity was calculated in Miller units<sup>46</sup>.

## 413 **Western Blot analysis**

414 SDS-PAGE and western blotting were performed as described previously<sup>9</sup>. Proteins  
415 were resolved in 8%, 10%, 12% or 15% gels using the Mini-PROTEAN system (Bio-Rad) and  
416 transferred to nitrocellulose membrane (GE Healthcare) by electrophoresis. Membranes were  
417 blocked in 5% (w/v) milk (Sigma) before incubation with primary antibodies. Membranes were  
418 washed with TBST (0.14 M NaCl, 0.03 M KCl and 0.01 M phosphate buffer plus Tween 20  
419 (0.05% v/v)) before incubation with HRP-conjugated secondary antibodies (Sigma). The  
420 resolved proteins on the membrane blots were detected using the Novex ECL HRP  
421 Chemiluminescent substrate (Invitrogen) or the Luminata Forte Western HRP substrate  
422 (Millipore) using a Las3000 Fuji Imager. For Fig. 3f, samples were taken after 8 hrs of growth  
423 and expression of Tse8 was assessed by Western blot as above; detection of Tse8 was  
424 performed using  $\alpha$ -HA antibody.

## 425 **Far-western dot blotting**

426 For Tse8 interactions with VgrG1a, VgrG1b, VgrG1c, GatA, GatB and GatC, purified  
427 untagged Tse8 was spotted on nitrocellulose membrane (3 mg/ml) and dried at room  
428 temperature. Membranes were blocked with TBST with 5% (w/v) milk or 2.5% (w/v) bovine  
429 serum albumin for 7 hrs at room temperature. *E. coli* overexpressing VgrG1a-V5, VgrG1b-V5,  
430 VgrG1c-V5 (equivalent 150 OD<sub>600</sub> units), GatA-V5, His-GatB or GatC-HA (equivalent 200  
431 OD<sub>600</sub> units) were pelleted and then resuspended in 10 mL 100 mM NaCl, 20 mM Tris, 10%  
432 (w/v) glycerol, 2% (w/v) milk powder and 0.1% (v/v) Tween-20 (Tween-20 was added after  
433 sonication) (pH 7.6) and sonicated. 10 mL of the crude lysates were applied directly to the

434 membranes and incubated overnight at room temperature. The membranes were  
435 immunoblotted with anti-V5 (1:5000 Invitrogen), anti-HA (1:5000 Biolegend), or anti-His  
436 (1:1000 Sigma) overnight at 4 °C and anti-mouse secondary (1:5000). Quantification of dot  
437 blots was performed using the Gel Analyzer plugin in ImageJ<sup>47</sup>. Levels were normalised to the  
438 control signal based on 3 independent experiments.

### 439 **Pull-down experiments**

440 *E. coli* BL21(DE3) strains expressing simultaneously GatA-V5, GatB-His and GatC-  
441 HA were grown in LB at 37°C to an OD<sub>600</sub> of 0.8 and expression was subsequently induced  
442 using 1 mM IPTG (Sigma) for 16 h at 18 °C. *E. coli* BL21(DE3) cells expressing Tse8-HA-  
443 Strep were grown in Terrific Broth at 37°C to an OD<sub>600</sub> of 0.8 and expression was subsequently  
444 induced using 1 mM IPTG (Sigma) for 16 h at 30 °C. The same expression strategy was used  
445 for *E. coli* BL21(DE3) strains expressing Tsi8-His or CcmE-His except that TSB medium was  
446 used. Cell pellets resulting during expression of GatCAB, Tsi8 and CcmE were resuspended in  
447 buffer A (50 mM Tris-HCl, 150 mM NaCl, 20 mM imidazole (pH 7.5)) and lysed by sonication  
448 after the addition of protease inhibitors (Roche). Cell debris were eliminated by centrifugation  
449 (48,000 g, 30 mins, 4 °C). Proteins were purified by immobilised metal affinity  
450 chromatography using nickel-Sepharose resin (GE Healthcare) equilibrated in buffer A.  
451 Proteins were then eluted off the resin with buffer A containing 200 mM instead of 20 mM  
452 imidazole. Cell pellets resulting during expression of Tse8 were resuspended in 50 mM Tris-  
453 HCl, 150 mM NaCl (pH 7.5) and lysed by sonication after the addition of protease inhibitors  
454 (Roche). Tse8-HA-Strep was purified using Strep-Tactin Sepharose (IBA), according to the  
455 manufacturer's specifications.

456 Pull-down experiments were performed using the above purified protein solutions and  
457 His-Tag Isolation & Pull Down Dynabeads (ThermoFischer Scientific). Briefly, the  
458 appropriate protein mixtures were generated by mixing 40 µM of the bait protein with 15-fold

459 molar excess of Tse8-HA-Strep; a condition containing solely the same amount of Tse8-HA-  
460 Strep was also tested as a negative binding control. The mixtures were incubated at 25 °C with  
461 agitation for 1 hr, added to the Dynabeads and processed according to the manufacturer's  
462 specifications. After elution, samples were denatured in 4 x Laemmli buffer and subjected to  
463 western blotting as above. Anti-V5 (1:5000 Invitrogen), anti-HA (1:5000 Biolegend), anti-His  
464 (1:1000 Sigma), or anti-StrepII (1:3000 IBA) primary antibodies were used along with an anti-  
465 mouse secondary (1:5000).

#### 466 **Whole-cell glutaminase assays**

467 The whole-cell glutaminase activity was measured as described previously<sup>48</sup> with some  
468 modifications as follows. *E. coli* B834 cells containing empty vector, *gata* or *tse8* in pET41a  
469 were grown to OD<sub>600</sub> ~ 0.6 when expression was induced by addition of IPTG (0.5 mM) and  
470 grown at 18 °C for 16 h. Cells pellets equivalent to 45 OD<sub>600</sub> units were washed in sodium  
471 acetate solution (sodium acetate (100 mM, pH 6), L-glutamine (20 mM)) and resuspended in a  
472 final volume of 600 µL sodium acetate solution, and incubated at 37 °C for 30 mins. 20 µL of  
473 cells were retained and serially diluted to quantify the CFUs present. The remaining cell  
474 volume was then lysed by heating at 99 °C for 3 min. Once cooled to room temperature 100  
475 µL of cell lysate was added to 2 mL of glutamate dehydrogenase solution (sodium acetate (10  
476 mM), NAD<sup>+</sup> (4 mM), hydroxylamine HCl (400 mM), 30 U of glutamate dehydrogenase (GDH)  
477 enzyme (Sigma) in potassium phosphate buffer (100 mM, pH 7.2)) and incubated at 60 °C for  
478 60 mins. 150 µL of the reaction was added to a 96 well clear plate and the relative accumulation  
479 of NADPH was calculated using the measured absorbance at 340 nm.

#### 480 **Expression and purification of Tse8 used for activity measurements**

481 The pET41a::GST-TEV-Tse8 vector coding for *P. aeruginosa* Tse8 was obtained by  
482 FastCloning<sup>49</sup> using pET41a:GST-Tse8 (see Extended Table 1) as template in order to express  
483 Tse8. See Supplementary Information for full details of expression and purification of Tse8.

#### 484 **Tse8 substrate activity assays**

485 Putative Tse8 substrates were selected based on the predicted GatA and PAM  
486 homology. Thus, the capacity of Tse8 to hydrolyse carbon-nitrogen bonds was analysed by  
487 mass spectrometry (MS) using as putative substrates the free amino acid glutamine and the C-  
488 terminally amidated peptide epinecidin-1 (sequence: GFIFHIIKGLFHAGKMIHGLV-NH<sub>2</sub>)  
489 (Bachem AG). Glutamine (10 mM) was incubated with 2  $\mu$ M of freshly-purified Tse8.  
490 Reactions were carried out in two different buffers to test the possible effect of pH; one set of  
491 reactions was carried out in 10 mM sodium phosphate buffer (pH 7.6) and another set of  
492 reactions was carried out in 20 mM Tris-HCl buffer (pH 8.3). For epinecidin-1, 5  $\mu$ M of  
493 freshly-purified Tse8 or the positive control protein Pam (purified as described previously<sup>50</sup>),  
494 were incubated with 50  $\mu$ M of putative substrate in 10 mM sodium phosphate buffer (pH 7.2);  
495 control reactions, lacking Tse8 or Pam, were also tested. Reactions were incubated overnight  
496 at 30 °C, followed by MS analysis. For full details on the MS analysis see Supplementary  
497 Information.

#### 498 **Bioinformatics analyses**

499 To predict which bacteria possess AsnS and/or GlnS and/or the amidotransferase  
500 GatCAB complex *E. coli* AsnS and GlnS protein sequences or *P. aeruginosa* GatA and GatB  
501 protein sequences were used to search the National Center for Biotechnology Information  
502 (NCBI) collection of non-redundant protein sequences of bacteria and archaea (*non-redundant*  
503 *Microbial proteins*, update: 2017/11/29) using the *pBLAST* search engine. See Supplementary  
504 Information file for full details on bioinformatic analysis.

#### 505 **Data availability statement**

506 PAK genome NCBI number is LR657304 and in the ENA (European Nucleotide  
507 Archive) is ERS195106. The resulting sequences of the T6SS TraDIS assays are available from  
508 the European Nucleotide archive (ENA) under study accession number ERS577921.

509 **Statistical analyses**

510 Statistical analysis was performed using GraphPad Prism version 5 and are represented  
511 in figures throughout the text as detailed below.

512 **Figure 2:**

513 Figure 2a – Mean OD<sub>600</sub> ± SEM is plotted over time from 3 independent replicates.

514 Figure 2b – Mean CFUs/mL ± SEM of recipient cells in competition/alone are represented  
515 from 3 independent replicates performed in triplicate. Two-tailed student's t-test, \*\*\* p<0.001;  
516 \* p<0.05; ns between PAKΔ*retS* and PAKΔ*retS*ΔH2ΔH3 (p = 0.436).

517 Figure 2c – Mean CFUs/mL ± SEM of recipient cells in competition/alone are represented from  
518 3 independent replicates performed in triplicate. Two-tailed student's t-test, \* p<0.05 for each  
519 sample to PAKΔ*retS*; ns between PAKΔ*retS*ΔH1 [pJN105] and PAKΔ*retS* [pJN:*tsi8*]  
520 (p=0.598).

521 Figure 2d – Mean OD<sub>600</sub> ± SEM is plotted over time from 3 independent replicates.

522 Figure 2e – Mean ± SEM of three biological replicates performed in triplicate. One-way Anova  
523 with Tukey's multiple comparison post-test, \* p<0.05 compared to the Miller units for both  
524 T18c:*tsi8* + T25 and T18c + T25:*tse8*.

525 **Figure 3:**

526 Figure 3a – Mean ± SEM of three biological replicates performed in triplicate. One-way Anova  
527 with Tukey's multiple comparison post-test, \* p<0.05 compared to the Miller units for each of  
528 VgrG1a, VgrG1b, VgrG1c and Tse8 with the respective T18c or T25 partner.

529 Figure 3b – Densitometry measurements normalized to the control and represented as the Mean  
530 ± SEM from 3 independent replicates. Two-tailed student's t-test, \*\* p<0.005 compared to  
531 control; ns between control and VgrG1b (p=0.169), VgrG1c (p=0.067) and CcmE (p=0.159).

532 Figure 3c – Mean CFUs/mL ± SEM of recovered recipient are represented from 3 independent  
533 replicates performed in triplicate. Two-tailed student's t-test, \*\*\* p<0.001 for PAKΔ*retS*

534 compared to  $\text{PAK}\Delta\text{retS}\Delta\text{H1}$  and  $\text{PAK}\Delta\text{retS}\Delta\text{H1}::\text{tse8S186A}$ ; ns between  $\text{PAK}\Delta\text{retS}$  and  
535  $\text{PAK}\Delta\text{retS}::\text{tse8S186A}$  ( $p = 0.226$ ).

536 Figure 3d-e – Mean  $\text{OD}_{600} \pm \text{SEM}$  is plotted over time from 3 independent replicates.

537 **Figure 4:**

538 Figure 4b – Densitometry measurements normalized to the control and represented as the Mean  
539  $\pm \text{SEM}$  from 3 independent replicates. Two-tailed student's t-test, \*\*\*  $p < 0.001$ ; ns for control  
540 compared to GatA ( $p = 0.077$ ) or to CcmE ( $p = 0.089$ ).

541 Figure 4d – Mean CFUs/mL  $\pm \text{SEM}$  of recipient cells in competition/alone are represented  
542 from represented from 3 independent replicates performed in triplicate. Two-tailed student's t-  
543 test, \*  $p < 0.05$ ; ns for  $\text{PAK}\Delta\text{retS}\Delta\text{H1}$  [pJN105] vs  $\text{PAK}\Delta\text{retS}$  [pJN:asnS] ( $p = 0.687$ ) or vs  
544  $\text{PAK}\Delta\text{retS}\Delta\text{H1}$  [pJN:asnS] ( $p = 0.631$ ).

545 **Extended Figure 2:**

546 Extended Figure 2a – Mean CFUs/mL  $\pm \text{SEM}$  of recipient cells in competition/alone are  
547 represented from represented from 3 independent replicates performed in triplicate. Two-tailed  
548 student's t-test, \*\*  $p < 0.005$  each compared to  $\text{PAK}\Delta\text{retS}$  donor vs recipient.

549 Extended Figure 2b – Mean CFUs/mL  $\pm \text{SEM}$  of recipient cells in competition/alone are  
550 represented from represented from 4 independent replicates performed in triplicate. Two-tailed  
551 student's t-test, \*\*\*  $p < 0.001$  compared to  $\text{PAK}\Delta\text{retS}$  donor vs recipient  $\text{PAK}\Delta\text{retS}\Delta\text{tsei8}$   
552 [pBBR1-MCS5] compared separately to each other data point; ns between recovered CFUs/mL  
553 for recipient  $\text{PAK}\Delta\text{retS}\Delta\text{tsei8}$  [pMMB-MCS5] vs  $\text{PAK}\Delta\text{retS}\Delta\text{H1}$  ( $p = 0.51$ ) and recipient  
554  $\text{PAK}\Delta\text{retS}\Delta\text{tsei8}$  [pMMB:tsei8] vs  $\text{PAK}\Delta\text{retS}$  ( $p = 0.61$ ).

555 Extended Figure 2c – Mean CFUs/mL  $\pm \text{SEM}$  of recipient cells in competition/alone are  
556 represented from represented from 3 independent replicates performed in triplicate. Two-tailed  
557 student's t-test, \*\*\*  $p < 0.005$  for  $\text{PAK}\Delta\text{retS}$  [pBBR1-MCS4] vs recipient compared to  
558  $\text{PAK}\Delta\text{retS}\Delta\text{tsei8}$  [pBBR1-MCS4] vs recipient; \*  $p < 0.05$  for  $\text{PAK}\Delta\text{retS}$  [pBBR1-MCS4] vs

559 recipient compared to  $PAK\Delta retS$  [pBBR1:*tse8*] and  $PAK\Delta retS\Delta tse8$  [pBBR1:*tse8*] vs  
560 recipient.

561 **Extended Figure 7:**

562 Extended Figure 7c – Mean  $\pm$  SEM of four biological replicates performed in triplicate. Two-  
563 tailed student's t-test, \*\*\*  $p < 0.0001$  for empty vector compared to pET41a:*gatA*; ns for empty  
564 vector compared to pET41A:*tse8* ( $p = 0.621$ ).

565



## 566 References

- 567 1 Sibley, C. D. *et al.* A polymicrobial perspective of pulmonary infections exposes an  
568 enigmatic pathogen in cystic fibrosis patients. *Proceedings of the National Academy of*  
569 *Sciences of the United States of America* **105**, 15070-15075 (2008).
- 570 2 Peters, B. M., Jabra-Rizk, M. A., O'May, G. A., Costerton, J. W. & Shirtliff, M. E.  
571 Polymicrobial interactions: impact on pathogenesis and human disease. *Clin Microbiol Rev* **25**,  
572 193-213 (2012).
- 573 3 Bingle, L. E., Bailey, C. M. & Pallen, M. J. Type VI secretion: a beginner's guide. *Curr*  
574 *Opin Microbiol* **11**, 3-8 (2008).
- 575 4 Pukatzki, S., McAuley, S. B. & Miyata, S. T. The Type VI secretion system:  
576 translocation of effectors and effector-domains. *Curr Opin Microbiol* **12**, 11-17 (2009).
- 577 5 Cianfanelli, F. R., Monlezun, L. & Coulthurst, S. J. Aim, load, fire: The Type VI  
578 secretion system, a bacterial nanoweapon. *Trends Microbiol* **24**, 51-62 (2016).
- 579 6 Filloux, A. Microbiology: a weapon for bacterial warfare. *Nature* **500**, 284-285 (2013).
- 580 7 Shneider, M. M. *et al.* PAAR-repeat proteins sharpen and diversify the Type VI  
581 secretion system spike. *Nature* **500**, 350-353 (2013).
- 582 8 Kudryashev, M. *et al.* Structure of the Type VI secretion system contractile sheath. *Cell*  
583 **160**, 952-962 (2015).
- 584 9 Hachani, A., Allsopp, L. P., Oduko, Y. & Filloux, A. The VgrG proteins are "a la carte"  
585 delivery systems for bacterial Type VI effectors. *J Biol Chem* **289**, 17872-17884 (2014).
- 586 10 Ma, J. *et al.* The Hcp proteins fused with diverse extended-toxin domains represent a  
587 novel pattern of antibacterial effectors in Type VI secretion systems. *Virulence*, 1-14,  
588 doi:10.1080/21505594.2017.1279374 (2017).
- 589 11 Silverman, J. M. *et al.* Haemolysin coregulated protein is an exported receptor and  
590 chaperone of Type VI secretion substrates. *Mol Cell* **51**, 584-593,  
591 doi:10.1016/j.molcel.2013.07.025 (2013).
- 592 12 Whitney, J. C. *et al.* Genetically distinct pathways guide effector export through the  
593 Type VI secretion system. *Mol Microbiol* **92**, 529-542 (2014).
- 594 13 Russell, A. B. *et al.* A widespread bacterial Type VI secretion effector superfamily  
595 identified using a heuristic approach. *Cell Host Microbe* **11**, 538-549 (2012).
- 596 14 Russell, A. B., Peterson, S. B. & Mougous, J. D. Type VI secretion system effectors:  
597 poisons with a purpose. *Nat Rev Microbiol* **12**, 137-148 (2014).
- 598 15 Hood, R. D. *et al.* A Type VI secretion system of *Pseudomonas aeruginosa* targets a  
599 toxin to bacteria. *Cell Host Microbe* **7**, 25-37 (2010).
- 600 16 Allsopp, L. P. *et al.* RsmA and AmrZ orchestrate the assembly of all three type VI  
601 secretion systems in *Pseudomonas aeruginosa*. *Proceedings of the National Academy of*  
602 *Sciences of the United States of America* **114**, 7707-7712 (2017).
- 603 17 Ibba, M., Becker, H. D., Stathopoulos, C., Tumbula, D. L. & Soll, D. The adaptor  
604 hypothesis revisited. *Trends Biochem Sci* **25**, 311-316 (2000).

- 605 18 Langridge, G. C. *et al.* Simultaneous assay of every *Salmonella Typhi* gene using one  
606 million transposon mutants. *Genome Res* **19**, 2308-2316 (2009).
- 607 19 Barquist, L. *et al.* The TraDIS toolkit: sequencing and analysis for dense transposon  
608 mutant libraries. *Bioinformatics* **32**, 1109-1111 (2016).
- 609 20 Pissaridou, P. *et al.* The *Pseudomonas aeruginosa* T6SS-VgrG1b spike is topped by a  
610 PAAR protein eliciting DNA damage to bacterial competitors. *Proceedings of the National  
611 Academy of Sciences of the United States of America* **115**, 12519-12524,  
612 doi:10.1073/pnas.1814181115 (2018).
- 613 21 Jiang, F., Waterfield, N. R., Yang, J., Yang, G. & Jin, Q. A *Pseudomonas aeruginosa*  
614 Type VI secretion phospholipase D effector targets both prokaryotic and eukaryotic cells. *Cell  
615 Host Microbe* **15**, 600-610 (2014).
- 616 22 Whitney, J. C. *et al.* An interbacterial NAD(P) glycohydrolase toxin requires elongation  
617 factor Tu for delivery to target cells. *Cell* (2015).
- 618 23 Kelley, L. A., Mezulis, S., Yates, C. M., Wass, M. N. & Sternberg, M. J. The Pyre2  
619 web portal for protein modeling, prediction and analysis. **10**, 845-858 (2015).
- 620 24 Labahn, J., Neumann, S., Buldt, G., Kula, M. R. & Granzin, J. An alternative  
621 mechanism for amidase signature enzymes. *J Mol Biol* **322**, 1053-1064 (2002).
- 622 25 Nakamura, A., Yao, M., Chimnaronk, S., Sakai, N. & Tanaka, I. Ammonia channel  
623 couples glutaminase with transamidase reactions in GatCAB. *Science* **312**, 1954-1958 (2006).
- 624 26 Suzuki, T. *et al.* Structure of the *Pseudomonas aeruginosa* transamidosome reveals  
625 unique aspects of bacterial tRNA-dependent asparagine biosynthesis. *Proceedings of the  
626 National Academy of Sciences of the United States of America* **112**, 382-387 (2015).
- 627 27 Yasuhira, K. *et al.* X-ray crystallographic analysis of the 6-aminohexanoate cyclic  
628 dimer hydrolase: catalytic mechanism and evolution of an enzyme responsible for nylon-6  
629 byproduct degradation. *J Biol Chem* **285**, 1239-1248 (2010).
- 630 28 Shin, S. *et al.* Characterization of a novel Ser-cisSer-Lys catalytic triad in comparison  
631 with the classical Ser-His-Asp triad. *J Biol Chem* **278**, 24937-24943 (2003).
- 632 29 Balotra, S. *et al.* X-ray structure of the amidase domain of AtzF, the allophanate  
633 hydrolase from the cyanuric acid-mineralizing multienzyme complex. *Appl Environ Microbiol*  
634 **81**, 470-480 (2015).
- 635 30 Lee, S. *et al.* Crystal structure analysis of a bacterial aryl acylamidase belonging to the  
636 amidase signature enzyme family. *Biochem Biophys Res Commun* **467**, 268-274 (2015).
- 637 31 Ruan, L. T., Zheng, R. C. & Zheng, Y. G. Mining and characterization of two amidase  
638 signature family amidases from *Brevibacterium epidermidis* ZJB-07021 by an efficient  
639 genome mining approach. *Protein Expr Purif* **126**, 16-25 (2016).
- 640 32 Valina, A. L., Mazumder-Shivakumar, D. & Bruice, T. C. Probing the Ser-Ser-Lys  
641 catalytic triad mechanism of peptide amidase: computational studies of the ground state,  
642 transition state, and intermediate. *Biochemistry* **43**, 15657-15672 (2004).
- 643 33 Wei, B. Q., Mikkelsen, T. S., McKinney, M. K., Lander, E. S. & Cravatt, B. F. A second  
644 fatty acid amide hydrolase with variable distribution among placental mammals. *J Biol Chem*  
645 **281**, 36569-36578 (2006).

- 646 34 Shin, S. *et al.* Structure of malonamidase E2 reveals a novel Ser-cisSer-Lys catalytic  
647 triad in a new serine hydrolase fold that is prevalent in nature. *Embo j* **21**, 2509-2516 (2002).
- 648 35 Patricelli, M. P. & Cravatt, B. F. Clarifying the catalytic roles of conserved residues in  
649 the amidase signature family. *J Biol Chem* **275**, 19177-19184 (2000).
- 650 36 Akochy, P. M., Bernard, D., Roy, P. H. & Lapointe, J. Direct glutaminyI-tRNA  
651 biosynthesis and indirect asparaginyI-tRNA biosynthesis in *Pseudomonas aeruginosa* PAO1.  
652 *J Bacteriol* **186**, 767-776 (2004).
- 653 37 Lambertsen, L., Sternberg, C. & Molin, S. Mini-Tn7 transposons for site-specific  
654 tagging of bacteria with fluorescent proteins. *Environ Microbiol* **6**, 726-732,  
655 doi:10.1111/j.1462-2920.2004.00605.x (2004).
- 656 38 Bernal, P., Allsopp, L. P., Filloux, A. & Llamas, M. A. The *Pseudomonas putida* T6SS  
657 is a plant warden against phytopathogens. *ISME J* **11**, 972-987, doi:10.1038/ismej.2016.169  
658 (2017).
- 659 39 Filloux, A., Hachani, A. & Bleves, S. The bacterial Type VI secretion machine: yet  
660 another player for protein transport across membranes. *Microbiology* **154**, 1570-1583 (2008).
- 661 40 Shalom, G., Shaw, J. G. & Thomas, M. S. *In vivo* expression technology identifies a  
662 Type VI secretion system locus in *Burkholderia pseudomallei* that is induced upon invasion of  
663 macrophages. *Microbiology* **153**, 2689-2699 (2007).
- 664 41 Zhang, W. *et al.* Modulation of a thermoregulated Type VI secretion system by AHL-  
665 dependent quorum sensing in *Yersinia pseudotuberculosis*. *Arch Microbiol* **193**, 351-363  
666 (2011).
- 667 42 Bernal, P., Allsopp, L. P. & Filloux, A. The *Pseudomonas putida* T6SS is a plant warden  
668 against phytopathogens. **11**, 972-987 (2017).
- 669 43 Kaniga, K., Delor, I. & Cornelis, G. R. A wide-host-range suicide vector for improving  
670 reverse genetics in gram-negative bacteria: inactivation of the *blaA* gene of *Yersinia*  
671 *enterocolitica*. *Gene* **109**, 137-141 (1991).
- 672 44 Hachani, A. *et al.* Type VI secretion system in *Pseudomonas aeruginosa*: secretion and  
673 multimerization of VgrG proteins. *J Biol Chem* **286**, 12317-12327 (2011).
- 674 45 Hachani, A., Lossi, N. S. & Filloux, A. A visual assay to monitor T6SS-mediated  
675 bacterial competition. *J Vis Exp*, e50103 (2013).
- 676 46 Karimova, G., Pidoux, J., Ullmann, A. & Ladant, D. A bacterial two-hybrid system  
677 based on a reconstituted signal transduction pathway. *Proceedings of the National Academy of*  
678 *Sciences of the United States of America* **95**, 5752-5756 (1998).
- 679 47 Schindelin, J. *et al.* Fiji: an open-source platform for biological-image analysis. *Nat*  
680 *Methods* **9**, 676-682, doi:10.1038/nmeth.2019 (2012).
- 681 48 Sato, I. *et al.* *Cryptococcus nodaensis* sp nov, a yeast isolated from soil in Japan that  
682 produces a salt-tolerant and thermostable glutaminase. *Journal of Industrial Microbiology and*  
683 *Biotechnology* **22**, 127-132, doi:10.1038/sj.jim.2900623 (1999).
- 684 49 Li, C. *et al.* FastCloning: a highly simplified, purification-free, sequence- and ligation-  
685 independent PCR cloning method. *BMC Biotechnol* **11**, 92 (2011).

- 686 50 Wu, B. *et al.* Versatile peptide C-terminal functionalization via a computationally  
687 engineered peptide amidase. *ACS Catalysis* **6**, 5405-5414 (2016).
- 688 51 Barquist, L., Boinett, C. J. & Cain, A. K. Approaches to querying bacterial genomes  
689 with transposon-insertion sequencing. *RNA Biol* **10**, 1161-1169, doi:10.4161/rna.24765 (2013).
- 690 52 Kulasekara, H. D. *et al.* A novel two-component system controls the expression of  
691 *Pseudomonas aeruginosa* fimbrial cup genes. *Mol Microbiol* **55**, 368-380 (2005).
- 692 53 Goodman, A. L. *et al.* A signaling network reciprocally regulates genes associated with  
693 acute infection and chronic persistence in *Pseudomonas aeruginosa*. *Dev Cell* **7**, 745-754,  
694 doi:10.1016/j.devcel.2004.08.020 (2004).
- 695 54 Figurski, D. H. & Helinski, D. R. Replication of an origin-containing derivative of  
696 plasmid RK2 dependent on a plasmid function provided *in trans*. *Proceedings of the National*  
697 *Academy of Sciences of the United States of America* **76**, 1648-1652 (1979).
- 698 55 McCarthy, R. R. *et al.* Cyclic-di-GMP regulates lipopolysaccharide modification and  
699 contributes to *Pseudomonas aeruginosa* immune evasion. *Nat Microbiol* **2**, 17027 (2017).
- 700 56 Daltrop, O., Stevens, J. M., Higham, C. W. & Ferguson, S. J. The CcmE protein of the  
701 *c*-type cytochrome biogenesis system: unusual *in vitro* heme incorporation into apo-CcmE and  
702 transfer from holo-CcmE to apocytochrome. *Proceedings of the National Academy of Sciences*  
703 *of the United States of America* **99**, 9703-9708, doi:10.1073/pnas.152120699 (2002).
- 704 57 Kovach, M. E. *et al.* Four new derivatives of the broad-host-range cloning vector  
705 pBBR1MCS, carrying different antibiotic-resistance cassettes. *Gene* **166**, 175-176 (1995).
- 706 58 Newman, J. R. & Fuqua, C. Broad-host-range expression vectors that carry the L-  
707 arabinose-inducible *Escherichia coli* *araBAD* promoter and the *araC* regulator. *Gene* **227**, 197-  
708 203 (1999).
- 709 59 Schmidt-Eisenlohr, H., Domke, N. & Baron, C. TraC of IncN plasmid pKM101  
710 associates with membranes and extracellular high-molecular-weight structures in *Escherichia*  
711 *coli*. *J Bacteriol* **181**, 5563-5571 (1999).
- 712 60 Edgar, R. C. MUSCLE: multiple sequence alignment with high accuracy and high  
713 throughput. *Nucleic Acids Res* **32**, 1792-1797 (2004).
- 714 61 Robert, X. & Gouet, P. Deciphering key features in protein structures with the new  
715 ENDscript server. *Nucleic Acids Res* **42**, W320-324 (2014).
- 716

717 **Supplementary Information**

718 Supplementary information document includes: Materials and methods; Supplementary Table  
719 1 with full list of TraDIS gene hits obtained with log fold change (logFC), p value for the  
720 standard and q value and Supplementary Table 2 with a list of relevant bacteria identified with  
721 either AsnS/GlnS and/or GatCAB sequence.

722

723 **Acknowledgements**

724 The Authors state that they have no conflict of interest. L.M.N. is supported by MRC Grant  
725 MR/N023250/1 and a Marie Curie Fellowship (PIIF-GA-2013-625318). A.F. is supported by  
726 Medical Research Council (MRC) Grants MR/K001930/1 and MR/N023250/1 and  
727 Biotechnology and Biological Sciences Research Council (BBSRC) Grant BB/N002539/1.  
728 D.A.I.M. is supported by the MRC Career Development Award MR/M009505/1. D.A.J  
729 acknowledges support by the MINECO Contract CTQ2016-76941-R. M.A.S.P. is supported  
730 by the MINECO under the “Juan de la Cierva Postdoctoral program” (position FJCI-2015-  
731 25725). Technical support from the CIC bioGUNE Metabolomics and Proteomics platforms  
732 are gratefully acknowledged.

733

734 **Author contributions**

735 L.M.N designed the overall experimental plan for the manuscript, performed the majority of  
736 the experiments presented and wrote the manuscript; A.K.C performed all TraDIS sequencing  
737 and associated bioinformatic analyses; E.M. assisted with protein pull-down assays; M.A.S.P  
738 performed protein purification and MS enzymatic assays; D.A.J designed and performed  
739 homology modelling, bioinformatic analyses, protein purification and enzymatic assays;  
740 D.A.I.M. performed protein purification and pull-down experiments and contributed to the  
741 revision of the manuscript; D.A.J performed homology modelling and bioinformatic analyses;

742 G.D and J.P contributed to project management and supported TraDIS sequencing and  
743 associated bioinformatic analyses; A.F contributed to project management, designed the  
744 overall experimental plan for the manuscript, and contributed to writing the manuscript.

745

746 **Tables**

747 **Table 1.** TraDIS allows identification of known and putative novel H1-T6SS immunity genes

| Immunity gene PAK/PA number | Immunity    | Toxin                | Log fold change* | Toxin activity/target                      |
|-----------------------------|-------------|----------------------|------------------|--------------------------------------------|
| PAKAF_03288/PA1845          | <i>tsi1</i> | <i>tse1</i>          | -2.30            | Amidase/peptidoglycan                      |
| PAKAF_02398/PA2703          | <i>tsi2</i> | <i>tse2</i>          | -7.30            | Unknown cytoplasmic target                 |
| PAKAF_01489/PA3485          | <i>tsi3</i> | <i>tse3</i>          | -1.28            | Muramidase/peptidoglycan                   |
| PAKAF_02307/PA2275          | <i>tsi4</i> | <i>tse4</i>          | -7.30            | Unknown periplasmic target                 |
| PAKAF_02417/PA2683.1        | <i>tsi5</i> | <i>tse5</i>          | -7.02            | Unknown periplasmic target                 |
| PAKAF_04414/PA0802          | PA0802      | PA0801               | -6.60            | Putative M4 peptidase regulator            |
| PAKAF_02302/PA2779          | PA2279      | PA2778               | -5.50            | Putative C39 peptidase                     |
| PAKAF_01707/PA3274          | PA3274      | PA3272               | -4.70            | Putative nucleoside triphosphate hydrolase |
| PAKAF_00797/PA4164          | <i>tsi8</i> | <i>tse8</i> (PA4163) | -3.30            | Putative amidase                           |

748

\*Log fold change compared to normalized levels of insertions in T6SS inactive and T6SS active libraries



749 **Figures and Figure Legends**

750

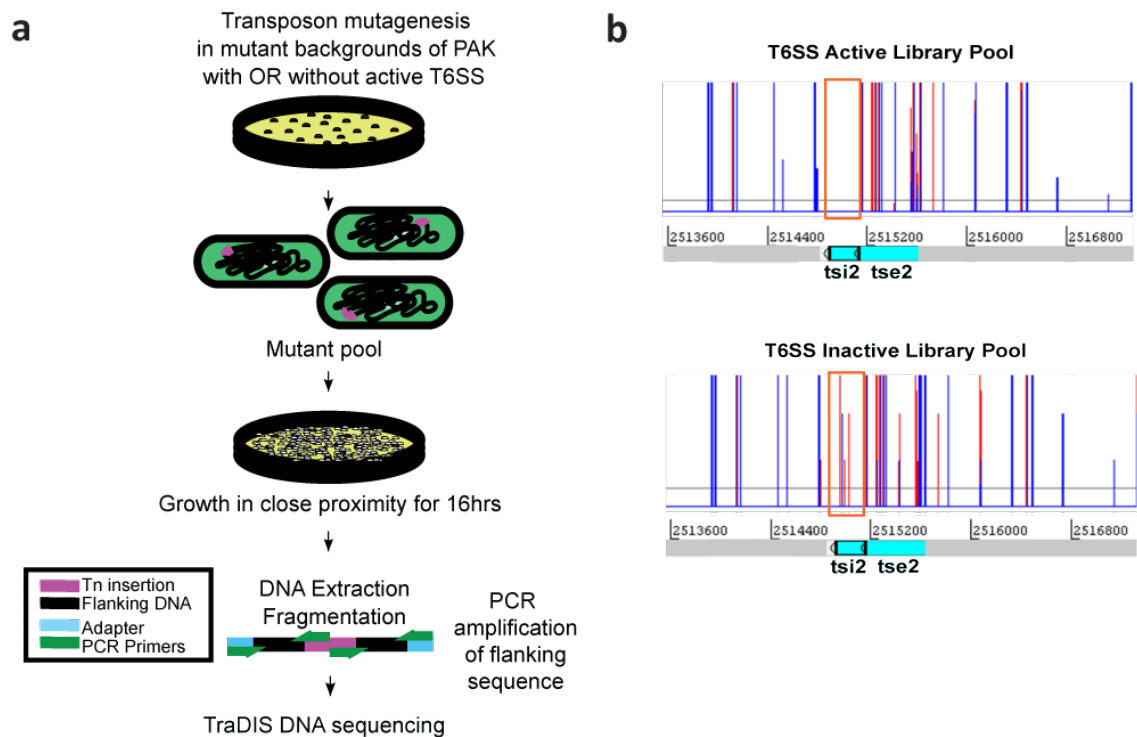

751

752 **Figure 1 | TraDIS library generation and sequencing workflow (a) and predicted outcome**

753 **of transposon insertions in *tsi* (immunity) genes in each library background (b).** a, *En*

754 *masse* transposon (Tn) mutagenesis in T6SS active (PAK $\Delta$ *retS*) or T6SS inactive

755 (PAK $\Delta$ *retS* $\Delta$ H1) backgrounds was performed to generate pooled transposon mutant libraries

756 of ~2 million mutants each. These libraries were then separately passaged overnight at high

757 contact density and the genomic DNA from recovered mutants was harvested. This genomic

758 DNA was then fragmented and adapters ligated to each end prior to PCR enrichment for

759 transposon-containing DNA fragments. The pooled DNA population was then subjected to

760 TraDIS DNA sequencing. b, Artemis (<http://www.sanger.ac.uk/science/tools/artemis>) plot file

761 showing distribution of transposon insertions (red and blue lines correspond to insertions

762 mapped from either forward or reverse sequence reads) in immunity gene (*tsi2* in this case) in

763 the T6SS active library background (top panel - no insertions permitted) and in the T6SS

764 inactive library background (right - insertions are permitted). The other H1-T6SS immunity



765 genes detected, as well as the putative novel T6SS immunity genes (Table 1) had a similar  
766 distribution of transposon insertions in each library background as for *tsi2*. Panel (a) adapted  
767 from Barquist *et al.*, (2013)<sup>51</sup>.

768

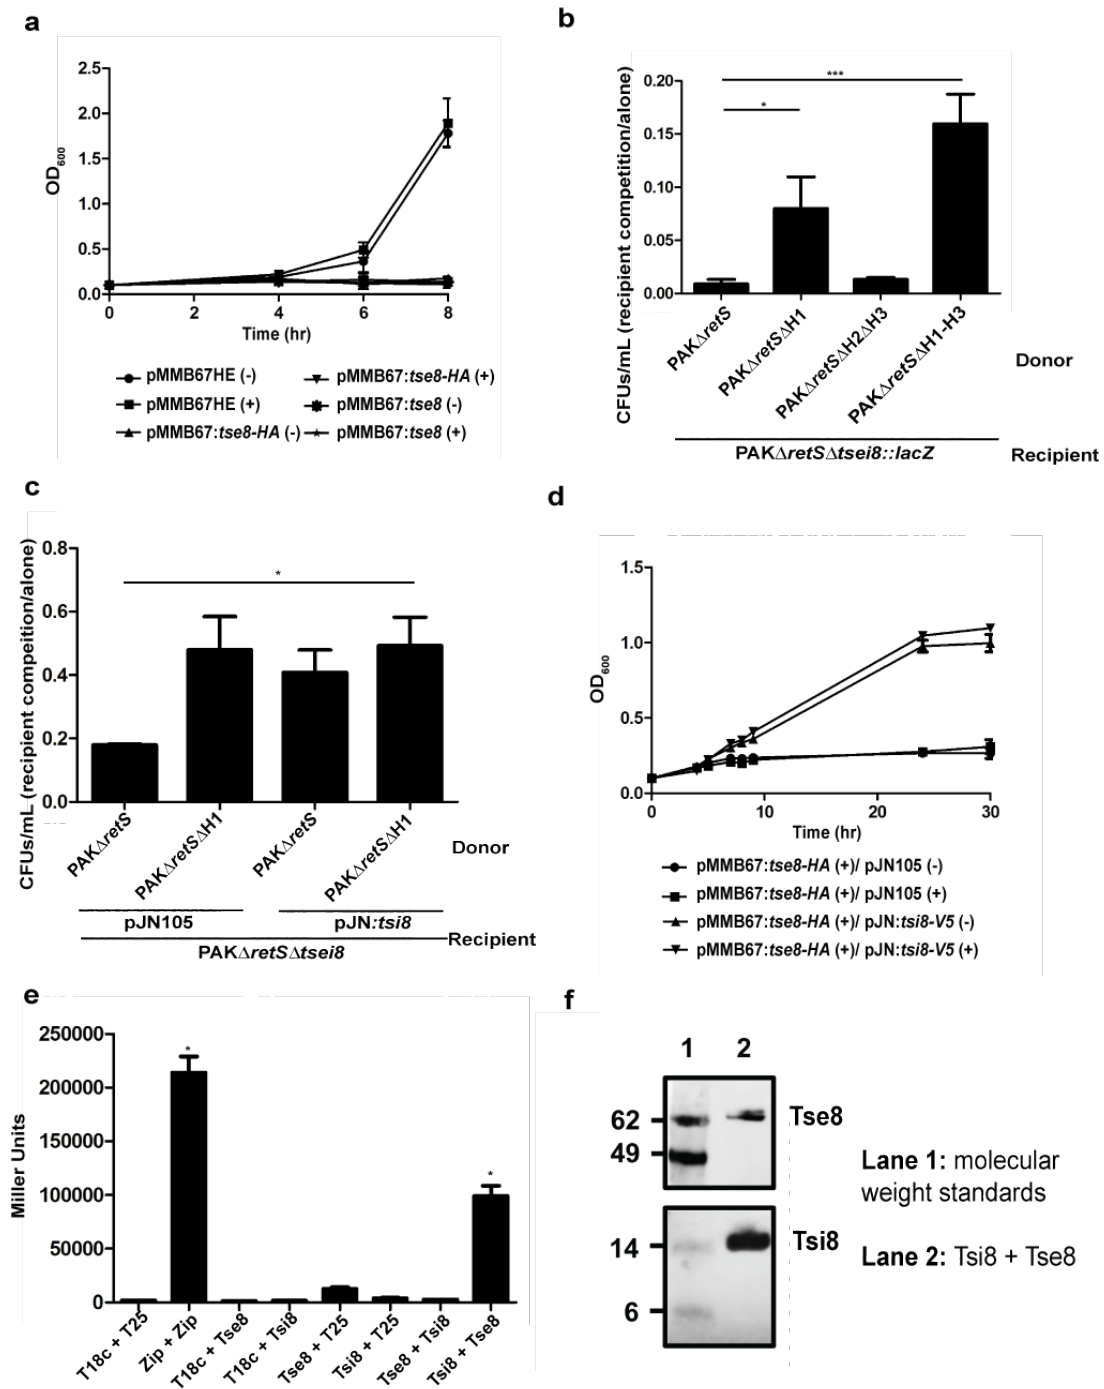

769

770 **Figure 2 | Tse8-Tsi8 is a novel H1-T6SS toxin-immunity pair. a-b,** Expression of Tse8  
 771 (either HA tagged or untagged) in PAK $\Delta$ retS $\Delta$ tsei8 is toxic when expressed *in trans* from  
 772 pMMB67HE ((-) no induction; (+) with induction) (a) or when delivered by the H1-T6SS into  
 773 a recipient strain lacking *tsi8* (b). c-d, Tsi8 can rescue Tse8 toxicity in competition assays with  
 774 donors PAK $\Delta$ retS or PAK $\Delta$ retS $\Delta$ H1 and recipient PAK $\Delta$ retS $\Delta$ tsei8 expressing either pJN105  
 775 or pJN:t*tsi8* (c) and in growth assays with PAK $\Delta$ retS $\Delta$ tsei8 expressing pMMB:tse8 or pJN:t*tsi8*

776 **(d). e**, Bacterial-Two-Hybrid (BTH) assays were used to quantify the level of interaction  
777 between Tse8 and Tsi8 with  $\beta$ -galactosidase activity assays performed on the cell lysates of  
778 each interaction pair. **f**, Tse8-HA-Strep interacts directly and specifically with Tsi8-His. The  
779 proteins were mixed and added to His-Tag Dynabeads, using Tsi8-His as a bait. The interaction  
780 is Tsi8-His specific (see Extended Data Fig. 3).  
781

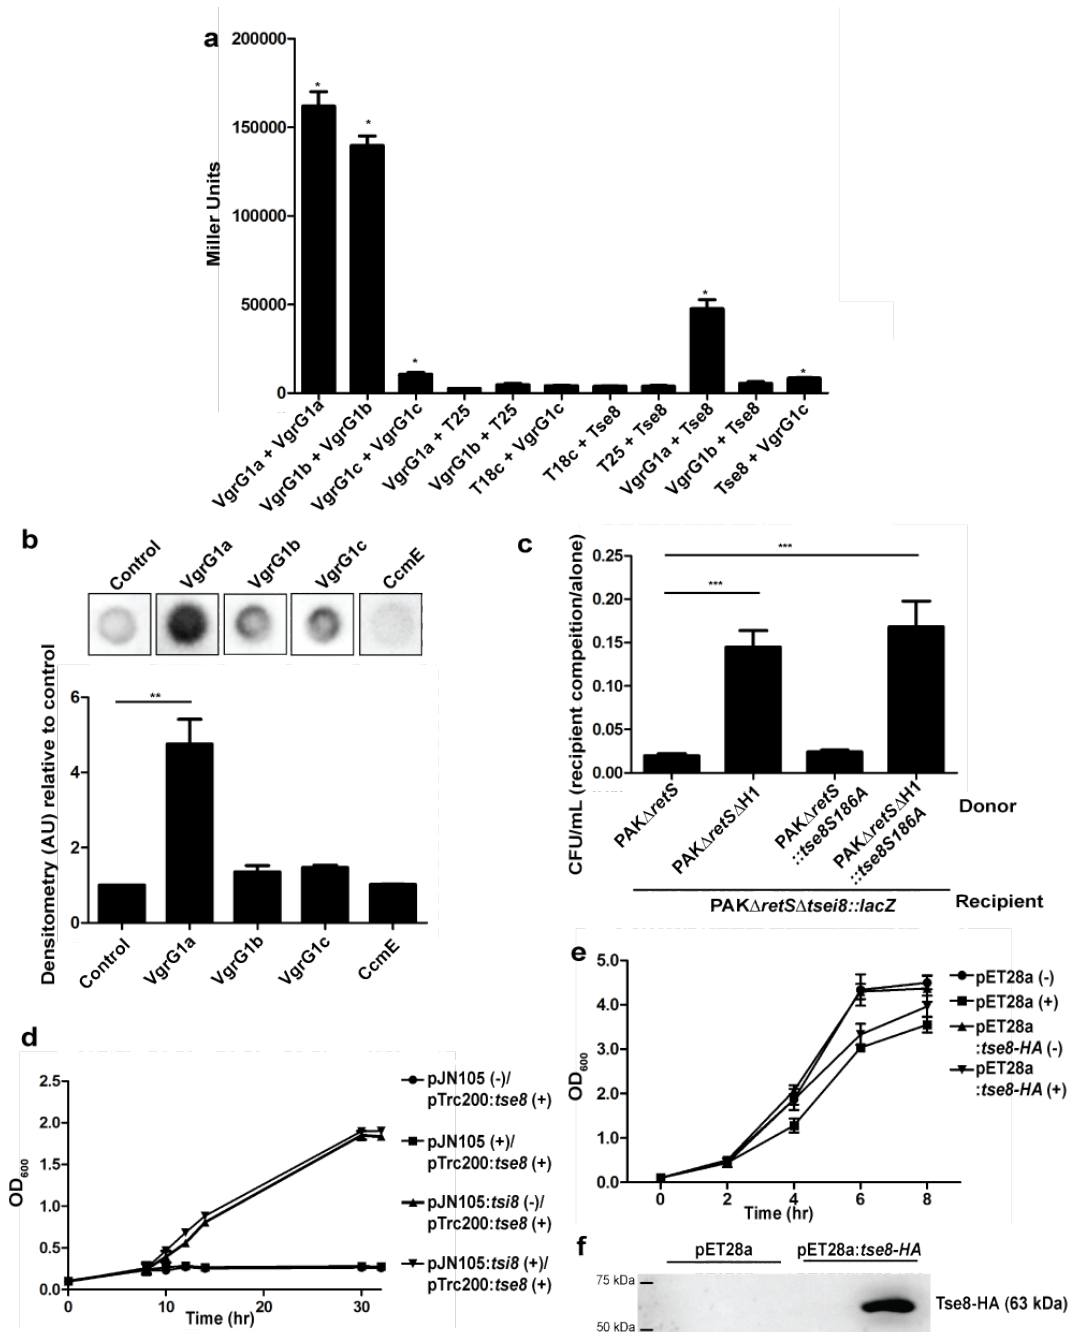

782

783 **Figure 3 | Tse8 interacts with VgrG1a and targets the transamidosome complex. a**, BTH

784 assays were used to quantify the level of interaction between Tse8 and VgrGs with  $\beta$ -

785 galactosidase activity assays performed on the cell lysates of each interaction pair. **b**, Tse8

786 interacts with VgrG1a in far western dot blot assays (top panel). Densitometry quantifications

787 of Tse8 interactions with respective partners (bottom panel). CcmE-His is used as a non-

788 specific binding control. **c**, Tse8 toxicity is not dependent on the conserved putative catalytic

789 residue S186. Competition assays were performed with donors  $PAK\Delta retS$ ,  $PAK\Delta retS\Delta H1$ ,  
790  $PAK\Delta retS::tse8S186A$  or  $PAK\Delta retS\Delta H1::tse8S186A$  and recipient  $PAK\Delta retS\Delta tse8::lacZ$ . **d-**  
791 **f**, Tse8 is only toxic in bacteria which rely on the transamidosome for protein synthesis.  
792 Expression of Tse8 in *A. tumefaciens* is toxic but can be rescued by coexpression of Tsi8 ((-)  
793 no induction; (+) with induction) (**d**). Expression of Tse8 in *E. coli* is not toxic ((-)  
794 (+) with induction) (**e**), despite Tse8 being expressed (**f**).

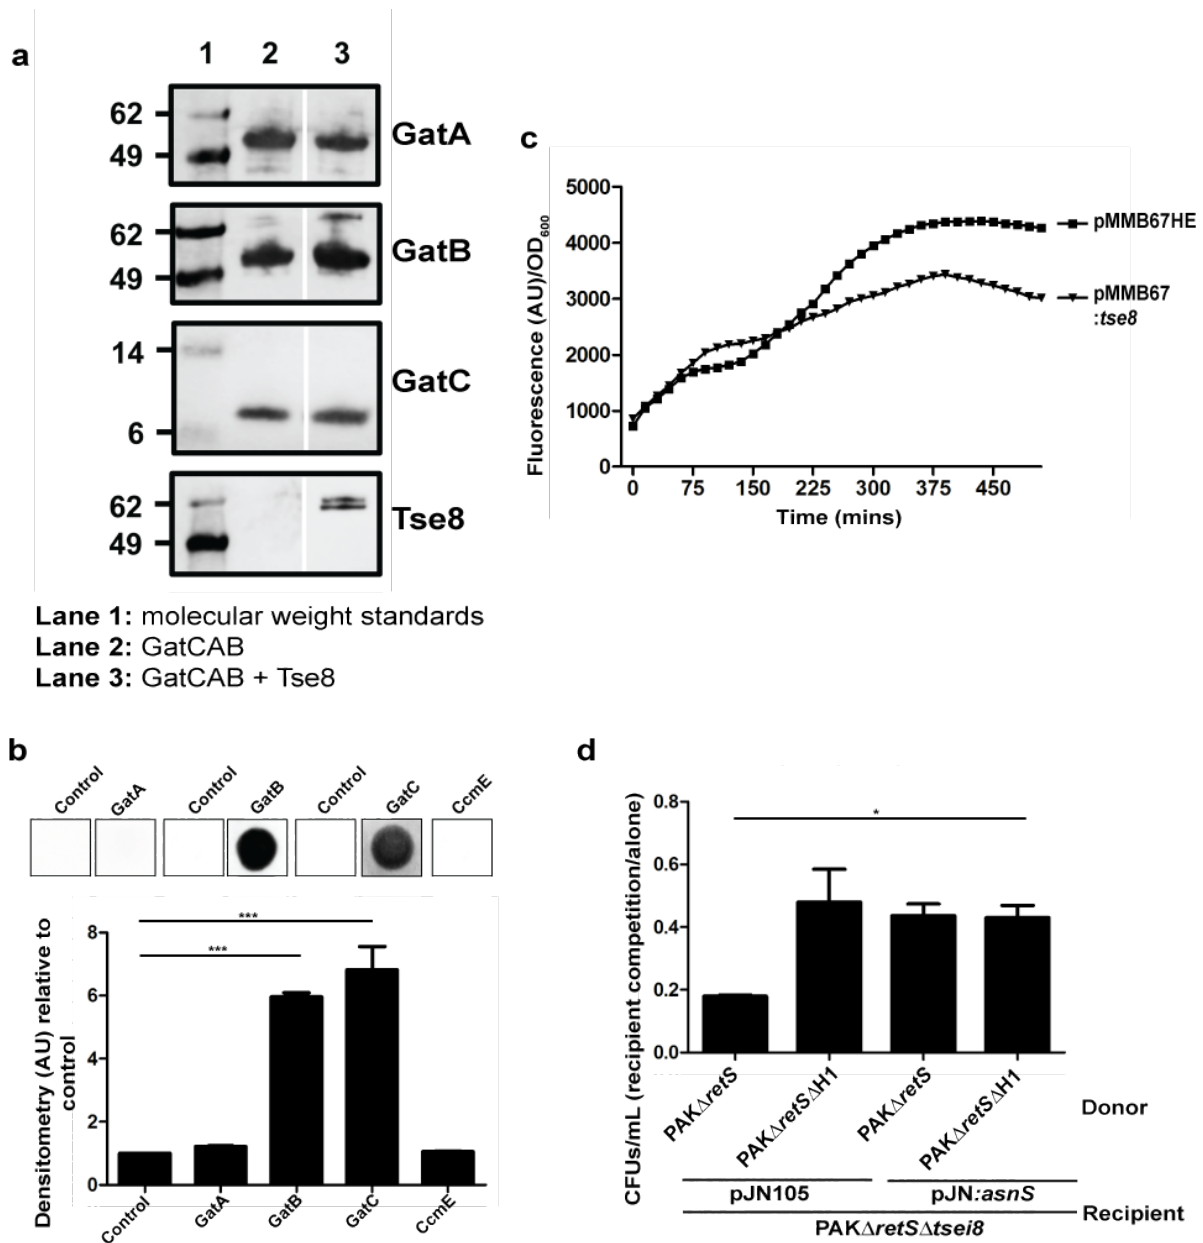

795

796 **Figure 4 | Tse8 interacts with transamidosome components and affects protein synthesis**

797 **ability.** **a**, Tse8-HA-Strep interacts directly and specifically with GatCAB, likely taking the

798 place of GatA in this complex. The proteins were mixed and added to His-Tag Dynabeads,

799 using GatB-His as a bait. Gaps indicate where a lane has been removed. The interaction is

800 GatCAB specific (see Extended Data Fig. 3). **b**, Tse8 interacts with GatB and GatC in far

801 western dot blot assays (top panel). Densitometry quantifications of Tse8 interactions with

802 respective partners (bottom panel). CcmE-His was used as a non-specific binding control. **c**,

803 Representative time course of Gfp levels/OD<sub>600</sub> within PAK $\Delta$ retS $\Delta$ tsei8 with an unstable Gfp

804 expressed from the vacant Tn7 chromosomal site in cells expressing either empty pMMB67HE  
805 or pMMB67:Tse8. The data are representative of data obtained in 4 independent experiments.  
806 **d**, Asn tRNA synthase (*asnS*) can rescue Tse8 toxicity. Competition assays were performed  
807 with donors PAK $\Delta$ *retS* or PAK $\Delta$ *retS* $\Delta$ *H1* and recipient PAK $\Delta$ *retS* $\Delta$ *tsei8* expressing either  
808 pJN105 or pJN:*asnS*.  
809

810 **Extended Tables**

811 **Extended Table 1.** Strains and plasmids used in the current study.

| Stain or plasmid                 | Relevant characteristics                                                                                                                                                                                                                                                     | Reference/source          |
|----------------------------------|------------------------------------------------------------------------------------------------------------------------------------------------------------------------------------------------------------------------------------------------------------------------------|---------------------------|
| <b>Strain</b>                    |                                                                                                                                                                                                                                                                              |                           |
| <i>Escherichia coli</i>          |                                                                                                                                                                                                                                                                              |                           |
| Dh5α                             | F - <i>endA1 glnV44 thi-1 recA1 relA1 gyrA96 deoR nupG purB20 φ80dlacZ ΔM15 Δ(lacZYA-argF)U169, hsdR17 (r K-mK+), λ-</i>                                                                                                                                                     | Invitrogen                |
| CC118λpir                        | Host strain for pKNG101 replication; Δ( <i>ara leu</i> ) <i>araD ΔlacX 74 galE galK -phoA 20 thi-1 rpsE rpoB argE (Am) recA 1 Rfr λpir</i>                                                                                                                                   | Laboratory collection     |
| SM10                             | Host strain for pBT20 and replication; <i>thi-1 thr leu tonA lacY supE recA ::RP4-2-Tc::Mu λpir</i> , KmR                                                                                                                                                                    | 52                        |
| BL21 (DE3)                       | B F <sup>-</sup> <i>ompT gal dcm lon hsdSB(rB mB<sup>-</sup>) λ(DE3 [lacI lacUV5-T7p07 ind1 sam7 nin5]) [malB<sup>+</sup>]<sub>K-12</sub>(λ<sup>S</sup>)</i>                                                                                                                 | Invitrogen                |
| B834                             | F- <i>ompT hsdSB(rB- mB-) gal dcm met</i> (DE3)                                                                                                                                                                                                                              | Invitrogen                |
| K12                              | <i>supE44 hsdS20 recA13 ara-14 proA2 lacY1 galK2 rpsL20 xyl-5 mtl-1</i>                                                                                                                                                                                                      | Laboratory collection     |
| DHM1                             | <i>cya-854 recA1 gyrA96 (Nal) thi1 hsdR17 spoT1 rfbD1 glnV44(AS)</i>                                                                                                                                                                                                         | 46                        |
| <i>Agrobacterium tumefaciens</i> |                                                                                                                                                                                                                                                                              |                           |
| C58                              | Wild type virulent strain containing nopaline-type Ti plasmid pTiC58                                                                                                                                                                                                         | Eugene Nester             |
| <i>Pseudomonas aeruginosa</i>    |                                                                                                                                                                                                                                                                              |                           |
| PAK                              | Wild type                                                                                                                                                                                                                                                                    | Filloux laboratory strain |
| PAKΔ <i>retS</i>                 | <i>retS</i> deletion mutant                                                                                                                                                                                                                                                  | 53                        |
| PAKΔ <i>retSΔvgrG1a</i>          | <i>retS</i> and <i>vgrG1a</i> deletion mutant                                                                                                                                                                                                                                | 44                        |
| PAKΔ <i>retSΔvgrG1c</i>          | <i>retS</i> and <i>vgrG1c</i> deletion mutant                                                                                                                                                                                                                                | 44                        |
| PAKΔ <i>retSΔvgrG1aΔvgrG1c</i>   | <i>retS</i> , <i>vgrG1a</i> and <i>vgrG1c</i> deletion mutant                                                                                                                                                                                                                | 44                        |
| PAKΔ <i>retSΔH1</i>              | <i>retS</i> and H1-T6SS cluster (encompassing the PAK genes corresponding to PA0070-PA0095) are deleted                                                                                                                                                                      | 44                        |
| PAKΔ <i>retSΔH1-H3</i>           | <i>retS</i> , H1-T6SS cluster (encompassing the PAK genes corresponding to PA0070-PA0095), H2-T6SS cluster (encompassing the PAK genes corresponding to mid PA1657 to PA1662) and H3-T6SS cluster (encompassing the PAK genes corresponding to PA2357 to PA2377) are deleted | Filloux laboratory strain |
| PAKΔ <i>retSΔH2ΔH3</i>           | <i>retS</i> , H2-T6SS cluster (encompassing the PAK genes corresponding to mid PA1657 to PA1662) and H3-T6SS cluster (encompassing the PAK genes corresponding to PA2357 to PA2377) are deleted                                                                              | This study                |
| PAKΔ <i>retSΔtsei8</i>           | <i>retS</i> as well as PA4163 to PA4164 are deleted                                                                                                                                                                                                                          | This study                |
| PAKΔ <i>retSΔtse8</i>            | <i>retS</i> as well as PA4163 ( <i>tse8</i> )                                                                                                                                                                                                                                | This study                |
| PAKΔ <i>retSΔtsei8::lacZ</i>     | <i>retS</i> as well as PA4163 to PA4164 are deleted with the <i>lacZ</i> gene from miniCTX-lac inserted at the vacant <i>att</i> site on the chromosome                                                                                                                      | This study                |
| PAKΔ <i>retS::tse8S186A</i>      | <i>retS</i> deletion mutant with <i>tse8</i> (native locus) having S186A substitution                                                                                                                                                                                        | This study                |
| PAKΔ <i>retSΔH1::tse8S186A</i>   | <i>retS</i> and H1-T6SS deletion mutant with <i>tse8</i> (native locus) having S186A substitution                                                                                                                                                                            | This study                |
| <b>Plasmid</b>                   |                                                                                                                                                                                                                                                                              |                           |
| pCR-BluntII-TOPO Blunt           | Cloning vector, Zeo <sup>R</sup> /Km <sup>R</sup>                                                                                                                                                                                                                            | Invitrogen                |
| pKNG101                          | Suicide vector, <i>sacB</i> , Str <sup>R</sup>                                                                                                                                                                                                                               | 43                        |
| pKNG101: <i>tsei8</i> mutator    | Mutator construct for deletion of <i>tsei8</i> by allelic exchange                                                                                                                                                                                                           | This study                |



|                                     |                                                                                                               |                               |
|-------------------------------------|---------------------------------------------------------------------------------------------------------------|-------------------------------|
| pKNG101: <i>tseS186A</i> mutator    | Mutator construct for generating <i>tse8S186A</i> at native site on chromosome by allelic exchange            | This study                    |
| pKNG101:H2-T6SS                     | Mutator construct for deletion of H2-T6SS by allelic exchange                                                 | Filloux laboratory collection |
| pKNG101:H3-T6SS                     | Mutator construct for deletion of H3-T6SS by allelic exchange                                                 | Filloux laboratory collection |
| pRK2013                             | Tra <sup>+</sup> , Mob <sup>+</sup> , Km <sup>R</sup>                                                         | 43                            |
| pBT20                               | For mariner transposon mutagenesis, Gm <sup>R</sup> /Amp <sup>R</sup>                                         | 54                            |
| pET-41a-3CD                         | Vector derived from pET-41a by Novagen produces fusion protein with N-terminal GST-His-S tag, Km <sup>R</sup> | 55                            |
| pE221                               | Coding region of leaderless <i>E. coli</i> CcmE (S32-S163) with a C-terminal polyhistidine tag, pET22b, ApR   | 56                            |
| pET28a                              | Expression vector, Km <sup>R</sup>                                                                            | Novagen                       |
| pET28a: <i>tse8</i>                 | Coding region of <i>tse8</i> in frame with N-terminal 6xHis)                                                  | This study                    |
| pET28a: <i>gatA</i> -V5             | Coding region of <i>gatA</i> with C-terminal V5 tag (out of frame with 6xHis)                                 | This study                    |
| pET28a: <i>tse8</i> -HA             | Coding region of <i>tse8</i> with C-terminal HA tag (out of frame with 6xHis)                                 | This study                    |
| pET41a: <i>gatA</i> -V5             | Coding region of <i>gatA</i> with C-terminal V5 tag (out of frame with 6xHis)                                 | This study                    |
| pET41a: <i>gatA</i> -V5-Strep       | Coding region of <i>gatA</i> with C-terminal V5-Strep tag (out of frame with 6xHis)                           | This study                    |
| pET41a: <i>tse8</i> -HA             | Coding region of <i>tse8</i> with C-terminal HA tag (out of frame with 6xHis)                                 | This study                    |
| pET41a: <i>tse8</i> -HA-Strep       | Coding region of <i>tse8</i> with C-terminal HA-Strep tag (out of frame with 6xHis)                           | This study                    |
| pET28a: <i>gatC</i> -HA             | Coding region of <i>gatC</i> with C-terminal HA tag (out of frame with 6xHis)                                 | This study                    |
| pET28a: <i>gatC</i> -HA-Strep       | Coding region of <i>gatC</i> with C-terminal HA-Strep tag (out of frame with 6xHis)                           | This study                    |
| pET41a-3CD-TEV                      | pET41a as above but with a TEV site introduced to allow cleavage of N-terminal tags                           | This study                    |
| pET41a-3CD-TEV: <i>tse8</i>         | pET41a with coding region of <i>tse8</i> in frame for (cleavable) N-terminal GST-His-S tag                    | This study                    |
| pACYCduet1                          | Dual expression vector, CmR                                                                                   | Novagen                       |
| pACYCduet1-His- <i>gatB</i>         | Coding region of <i>gatB</i> with N-terminal His tag into MCS1                                                | This study                    |
| pACYCduet1-His- <i>gatB/gatC-HA</i> | Coding region of <i>gatB</i> with N-terminal His tag into MCS1 and <i>gatC</i> with C terminal HA tag in MCS2 | This study                    |
| pMMB67HE                            | Expression vector, Ap <sup>R</sup>                                                                            | Filloux laboratory collection |
| pMMB67: <i>tse8</i>                 | Coding region of <i>tse8</i> with no tag                                                                      | This study                    |
| pMMB67: <i>tse8</i> -HA             | Coding region of <i>tse8</i> with C-terminal HA tag                                                           | This study                    |
| pMMB67: <i>vgrG1a</i> -V5           | Coding region of <i>vgrG1a</i> (PA0091) with C-terminal V5 tag                                                | This study                    |
| pMMB67: <i>vgrG1b</i> -V5           | Coding region of <i>vgrG1b</i> (PA0095) with C-terminal V5 tag                                                | This study                    |
| pMMB67: <i>vgrG1c</i> -V5           | Coding region of <i>vgrG1c</i> (PA2685) with C-terminal V5 tag                                                | This study                    |
| pBBR1MCS5                           | Expression vector, Gm <sup>R</sup>                                                                            | 57                            |
| pBBR1: <i>tsei8</i>                 | Coding region of <i>tsei8</i> with 500 bp upstream region to include native promoter                          | This study                    |
| pBBR1MCS4                           | Expression vector, Amp <sup>R</sup>                                                                           | 57                            |
| pBBR1: <i>tse8</i>                  | Coding region of <i>tse8</i> in constitutively expressed plasmid                                              | This study                    |

|                                    |                                                                                                                      |            |
|------------------------------------|----------------------------------------------------------------------------------------------------------------------|------------|
| miniTn7-PA1/04/03- <i>gfp</i> -AGA | Unstable Gfp variant under control of constitutive <i>lac</i> promoter. Integration at vacant Tn7 site on chromosome | 37         |
| pJN105                             | Expression vector, Gm <sup>R</sup>                                                                                   | 58         |
| pJN: <i>tse8</i> -HA               | Coding region of <i>tse8</i> with C-terminal HA tag                                                                  | This study |
| pJN: <i>tsi8</i> -V5               | Coding region of <i>tsi8</i> with C-terminal V5 tag                                                                  | This study |
| pJN: <i>asnS</i> -His              | Coding region of <i>asnS</i> from <i>E. coli</i> with C-terminal His tag                                             | This study |
| pTrc200                            | Sm <sup>R</sup> , Sp <sup>R</sup> , pVS1 origin <i>lacI</i> <sup>q</sup> , <i>trc</i> promoter expression vector     | 59         |
| pTrC: <i>tse8</i> -HA              | Coding region of <i>tse8</i> with C-terminal HA tag                                                                  | This study |
| pUT18c                             | Vector for Bacterial Two-Hybrid assay                                                                                | 46         |
| pKT25                              | Vector for Bacterial Two-Hybrid assay                                                                                | 46         |
| pUT18c-Zip                         | N-terminal T18 fusion on leucine zipper of GCN4                                                                      | 46         |
| pKT25-Zip                          | N-terminal T25 fusion on leucine zipper of GCN4                                                                      | 46         |
| pUT18c- <i>tse8</i>                | N-terminal T18 fusion to coding region of <i>tse8</i>                                                                | This study |
| pKT25- <i>tse8</i>                 | N-terminal T25 fusion to coding region of <i>tse8</i>                                                                | This study |
| pUT18c- <i>tsi8</i> -V5            | N-terminal T18 fusion to coding region of <i>tsi8</i> with C-terminal V5 tag                                         | This study |
| pKT25- <i>tsi8</i> -V5             | N-terminal T25 fusion to coding region of <i>tsi8</i> with C-terminal V5 tag                                         | This study |
| pUT18c- <i>vgrG1a</i>              | N-terminal T18 fusion to coding region of <i>vgrG1a</i>                                                              | This study |
| pKT25c- <i>vgrG1a</i>              | N-terminal T25 fusion to coding region of <i>vgrG1a</i>                                                              | This study |
| pUT18c- <i>vgrG1b</i>              | N-terminal T18 fusion to coding region of <i>vgrG1b</i>                                                              | This study |
| pKT25c- <i>vgrG1b</i>              | N-terminal T25 fusion to coding region of <i>vgrG1b</i>                                                              | This study |
| pUT18c- <i>vgrG1c</i>              | N-terminal T18 fusion to coding region of <i>vgrG1c</i>                                                              | This study |
| pKT25c- <i>vgrG1c</i>              | N-terminal T25 fusion to coding region of <i>vgrG1c</i>                                                              | This study |
| pUT18c- <i>vgrG6</i>               | N-terminal T18 fusion to coding region of <i>vgrG6</i> (PA5266)                                                      | This study |
| pKT25c- <i>vgrG6</i>               | N-terminal T25 fusion to coding region of <i>vgrG6</i> (PA5266)                                                      | This study |

812

813 **Extended Table 2.** Primers used in the current study.

| Primer list | Name                             | Oligonucleotide sequence (5'-3')    | Description                                       |
|-------------|----------------------------------|-------------------------------------|---------------------------------------------------|
| OAL2939     | Primer 1 <i>tsei8</i> left F     | GGCATCCACGGC<br>GCTTCCG             | Generate deletion mutant of <i>tsei8</i> primer 1 |
| OAL2940     | Primer 2 <i>tsei8</i> left R     | TCAGTCGCGCTCG<br>ATCATGCTGTCAC<br>C | Generate deletion mutant of <i>tsei8</i> primer 2 |
| OAL2941     | Primer 3 <i>tsei8</i> right F    | ATGATCGAGCGC<br>GACTGAGCGCTT        | Generate deletion mutant of <i>tsei8</i> primer 3 |
| OAL2942     | Primer 4 <i>tsei8</i> right R    | GCTCTACATCGGC<br>ACGTTCCACC         | Generate deletion mutant of <i>tsei8</i> primer 4 |
| OAL2943     | Primer 5 upstream <i>tsei8</i>   | GCGTTGACCGTG<br>ATGCCAG             | Generate deletion mutant of <i>tsei8</i> primer 5 |
| OAL2944     | Primer 6 downstream <i>tsei8</i> | GAGGACCCGGCC<br>TACTACGG            | Generate deletion mutant of <i>tsei8</i> primer 6 |
| OAL2939     | Primer 1 <i>tse8</i> left F      | GGCATCCACGGC<br>GCTTCCG             | Generate deletion mutant of <i>tse8</i> primer 1  |
| OAL4770     | Primer 2 <i>tse8</i> left R      | TCACTTGCTCTCG<br>ATCATGCTGTCAC<br>C | Generate deletion mutant of <i>tse8</i> primer 2  |
| OAL4771     | Primer 3 <i>tse8</i> right F     | ATGATCGAGAGC<br>AAGTGAAGGCG<br>CGG  | Generate deletion mutant of <i>tse8</i> primer 3  |
| OAL4772     | Primer 4 <i>tse8</i> right R     | GCTTCGCCGCTA<br>CACCACGG            | Generate deletion mutant of <i>tse8</i> primer 4  |
| OAL2943     | Primer 5 upstream <i>tse8</i>    | GCGTTGACCGTG<br>ATGCCAG             | Generate deletion mutant of <i>tse8</i> primer 5  |
| OAL4773     | Primer 6 downstream <i>tse8</i>  | GCGAGCGCTGG<br>GATTCC               | Generate deletion mutant of <i>tse8</i> primer 6  |
| OAL996      | Primer 1 H2-T6SS left F          | GACTGGTTGAAA<br>ATCCTGGAAAAC        | Generate deletion mutant in H2-T6SS primer 1      |
| OAL997      | Primer 2 H2-T6SS left F          | TCAGGCCAACGG<br>CCTCCTGCTGGC<br>GC  | Generate deletion mutant in H2-T6SS primer 2      |
| OAL998      | Primer 3 H2-T6SS left F          | AGGAGCCGTTC<br>GCCTGAGGTGGG<br>TGC  | Generate deletion mutant in H2-T6SS primer 3      |
| OAL999      | Primer 4 H2-T6SS left F          | CAACACGGTATA<br>GGGTTGTG            | Generate deletion mutant in H2-T6SS primer 4      |
| OAL1000     | Primer 5 H2-T6SS left F          | GAATTGTTAAGAT<br>ATTCATTGGCGCA<br>C | Generate deletion mutant in H2-T6SS primer 5      |
| OAL1001     | Primer 6 H2-T6SS left F          | TCGAGCAGCAGG<br>GTTCCGCCATCCG<br>CG | Generate deletion mutant in H2-T6SS primer 6      |
| OAL1002     | Primer 1 H3-T6SS left F          | ATTTCCGACATAT<br>GGTGAAACATC        | Generate deletion mutant in H3-T6SS primer 1      |
| OAL1003     | Primer 2 H3-T6SS left F          | TGCTGATCAGAA<br>GCGCAGCTCGAC<br>GTT | Generate deletion mutant in H3-T6SS primer 2      |
| OAL1004     | Primer 3 H3-T6SS left F          | CTGCGTTCTGAT<br>CAGCATCAACCTC<br>T  | Generate deletion mutant in H3-T6SS primer 3      |
| OAL1005     | Primer 4 H3-T6SS left F          | GTGAATGGCACG<br>AATAAATAGTTC<br>ATA | Generate deletion mutant in H3-T6SS primer 4      |

|         |                         |                                                                                                    |                                                                                                                                  |
|---------|-------------------------|----------------------------------------------------------------------------------------------------|----------------------------------------------------------------------------------------------------------------------------------|
| OAL1006 | Primer 5 H3-T6SS left F | AACTGCTGCCGGT<br>AGTCGCGGCGGT<br>AC                                                                | Generate deletion mutant in H3-T6SS primer 5                                                                                     |
| OAL1007 | Primer 6 H3-T6SS left F | CACCCTTTCCAGT<br>AGTCGCACATCA<br>GC                                                                | Generate deletion mutant in H3-T6SS primer 6                                                                                     |
| OAL3095 | <i>tsei8</i> comp_F     | GGATCCCAGCGT<br>CTCGGCGGTTTG                                                                       | Generate complementation construct of <i>tsei8</i> with native promoter (500 bp upstream of <i>tsei8</i> ) ( <i>Bam</i> HI site) |
| OAL3096 | <i>tsei8</i> comp_R     | AAGCTTTCAGTCG<br>CGCAGGGCGTA                                                                       | Generate complementation construct of <i>tsei8</i> ( <i>Hind</i> III site)                                                       |
| OAL3099 | <i>tse8</i> comp_F      | CCGGCGGATCCT<br>AACAGGAGGAAT<br>TAACCATGATCG<br>AGGTCACCGAGG<br>TT                                 | Generate complementation of <i>tse8</i> with C-terminal V5 tag ( <i>Bam</i> HI site)                                             |
| OAL3100 | <i>tse8</i> comp_R      | CCGGGCTCGAGT<br>CACGTAGAATCG<br>AGACCGAGGAGA<br>GGGTTAGGGATA<br>GGCTTACCCTTGC<br>TTGCCAGCGGTG<br>G | Generate complementation of <i>tse8</i> with C-terminal V5 tag ( <i>Xho</i> I site)                                              |
| OAL3792 | <i>tse8</i> _BTH_F      | GAGCTCTCACTTG<br>CTTGCCAGCGG                                                                       | Generate <i>tse8</i> with N-terminal T18/T25 fusion in BTH vector ( <i>Bam</i> HI site)                                          |
| OAL3792 | <i>tse8</i> _BTH_R      | GAGCTCTCACTTG<br>CTTGCCAGCGG                                                                       | Generate <i>tse8</i> with N-terminal T18/T25 fusion in BTH vector ( <i>Sac</i> I site)                                           |
| OAL4774 | <i>tse8</i> no tag_F    | TCTAGAATGATCG<br>AGGTCACCGAGG<br>TT                                                                | Generate <i>tse8</i> with no tag ( <i>Xba</i> I site)                                                                            |
| OAL4775 | <i>tse8</i> no tag_R    | GAGCTCTCACTTG<br>CTTGCCAGCGGT                                                                      | Generate <i>tse8</i> with no tag ( <i>Sac</i> I site)                                                                            |
| OAL3560 | <i>tsi8</i> BTH_F       | GCGCTCTAGAAT<br>GCAGCGACTCTTC<br>GTCTACGGCAGC                                                      | Generate <i>tse8</i> with N-terminal T18/T25 fusion and C-terminal V5 tag in BTH vector ( <i>Xba</i> I site)                     |
| OAL3561 | <i>tsi8</i> BTH_R       | GGATCCTCACGTA<br>GAATCGAGACCG<br>AGGAGAGGGTTA<br>GGGATAGGCTTA<br>CCGTCGCGCAGG<br>GCGTAGAC          | Generate <i>tse8</i> with N-terminal T18/T25 fusion and C-terminal V5 tag in BTH vector ( <i>Bam</i> HI site)                    |
| OAL4061 | His- <i>tsi8</i> _F     | GGATCCATGCAG<br>CGACTCTTCGTCT<br>A                                                                 | Generate <i>tsi8</i> with N-terminal His tag in pET28a ( <i>Bam</i> HI site)                                                     |
| OAL4062 | His- <i>tsi8</i> _R     | GAGCTCTCAGTCG<br>CGCAGGGCGT                                                                        | Generate <i>tsi8</i> with N-terminal His tag in pET28a ( <i>Sac</i> I site)                                                      |
| OAL3231 | <i>vgrGla</i> _F        | ATGCAACTGACC<br>CGCCTGGTCCAG<br>GTGGA                                                              | Generation of <i>vgrGla</i> (PA0091) with C-terminal V5 tag                                                                      |
| OAL3232 | <i>vgrGla</i> _R        | TCAGCACGCGTA<br>GTCCGGCACGTC<br>GTACGGGTAGCC<br>CTTCGCCGGCGGC<br>GGAA                              | Generation of <i>vgrGla</i> (PA0091) with C-terminal V5 tag                                                                      |
| OAL3233 | <i>vgrGlb</i> _F        | ATGGCACTTGCGC<br>AACAGACCCGCC<br>TGGT                                                              | Generation of <i>vgrGlb</i> (PA0095) with C-terminal V5 tag                                                                      |

|         |                         |                                                                                        |                                                                                                                                                                          |
|---------|-------------------------|----------------------------------------------------------------------------------------|--------------------------------------------------------------------------------------------------------------------------------------------------------------------------|
| OAL3234 | <i>vgrG1b</i> _R        | TCAGCACGCGTA<br>GTCCGGCACGTC<br>GTACGGGTAGTTC<br>TGGAGGATCTTGC<br>GT                   | Generation of <i>vgrG1b</i> (PA0095) with C-terminal V5 tag                                                                                                              |
| OAL3235 | <i>vgrG1c</i> _F        | GTGGCTATTGGCC<br>AGCCTTTCGCGAC<br>GGC                                                  | Generation of <i>vgrG1c</i> (PA2685) with C-terminal V5 tag                                                                                                              |
| OAL3236 | <i>vgrG1c</i> _R        | TCAGCACGCGTA<br>GTCCGGCACGTC<br>GTACGGGTAAACA<br>GTTGATATCGACA<br>TTGG                 | Generation of <i>vgrG1c</i> (PA2685) with C-terminal V5 tag                                                                                                              |
| OAL1740 | <i>vgrG1a</i> BTH_F     | GCGCGGGATCCC<br>ATGCAACTGACC<br>CGCCTG                                                 | Generate <i>vgrG1a</i> with N-terminal T18/T25 fusion in BTH vector ( <i>Bam</i> HI site)                                                                                |
| OAL1741 | <i>vgrG1a</i> BTH_R     | GCGCGGAATTCTC<br>AGCCCTTCGCCGG<br>CGG                                                  | Generate <i>vgrG1a</i> with N-terminal T18/T25 fusion in BTH vector ( <i>Eco</i> RI site)                                                                                |
| OAL1860 | <i>vgrG1b</i> BTH_F     | GCGCGTCTAGAG<br>ATGGCACTTGCGC<br>AACAGACC                                              | Generate <i>vgrG1b</i> with N-terminal T18/T25 fusion in BTH vector ( <i>Xba</i> I site)                                                                                 |
| OAL1861 | <i>vgrG1b</i> BTH_R     | GCGCGGAATTCTC<br>AGTTCTGGAGGA<br>TCTTGGC                                               | Generate <i>vgrG1b</i> with N-terminal T18/T25 fusion in BTH vector ( <i>Eco</i> RI site)                                                                                |
| OAL2390 | <i>vgrG1c</i> BTH_F     | GCGCGTCTAGAA<br>TGCAACACACCC<br>GCCTGGTACACG                                           | Generate <i>vgrG1c</i> with N-terminal T18/T25 fusion in BTH vector ( <i>Xba</i> I site)                                                                                 |
| OAL2391 | <i>vgrG1c</i> BTH_R     | GCGCGGAATTCTC<br>AACAGTTGATATC<br>GACATTGGGC                                           | Generate <i>vgrG1c</i> with N-terminal T18/T25 fusion in BTH vector ( <i>Eco</i> RI site)                                                                                |
| OAL2458 | <i>vgrG6</i> BTH_F      | GCGCGTCTAGAA<br>TGTTCCGCCCCGC<br>CAACCAGACGC                                           | Generate <i>vgrG6</i> with N-terminal T18/T25 fusion in BTH vector ( <i>Xba</i> I site)                                                                                  |
| OAL2459 | <i>vgrG6</i> BTH_R      | GCGCGGAATTCTC<br>ATGGCGTGGGCT<br>CATCCTTGTCG                                           | Generate <i>vgrG6</i> with N-terminal T18/T25 fusion in BTH vector ( <i>Eco</i> RI site)                                                                                 |
| OAL3099 | <i>tse8</i> -HA_F       | CCGGCGGATCCT<br>AACAGGAGGAAT<br>TAACCATGATCG<br>AGGTCACCGAGG<br>TT                     | Generate <i>tse8</i> -HA ( <i>Bam</i> HI site and shine-dalgarno)                                                                                                        |
| OAL3310 | <i>tse8</i> -HA_R       | GCCGGCTGCAGT<br>CAGCACGCGTAG<br>TCCGGCACGTCGT<br>ACGGGTACTIONGCT<br>TGCCAGCGGTGG<br>AG | Generate <i>tse8</i> -HA ( <i>Pst</i> I site)                                                                                                                            |
| OAL3669 | <i>tse8</i> exp_F       | GCGCGGATCCAT<br>CGAGGTCACCGA<br>GGTTTC                                                 | Generate <i>tse8</i> with N-terminal GST-His-S tag for purification ( <i>Bam</i> HI site)                                                                                |
| OAL3670 | <i>tse8</i> exp_R       | GCGGCCGCTCACT<br>TGCTTGCCAGCGG                                                         | Generate <i>tse8</i> with N-terminal GST-His-S tag for purification ( <i>Not</i> I site)                                                                                 |
| OAL5140 | <i>tse8</i> -HA-Strep_F | CATATGATCGAG<br>GTCACCGAGGTTT<br>CCATCGCCGAGCT<br>GCGTG                                | Generate <i>tse8</i> with C-terminal HA and Strep tags ( <i>Nde</i> I site) with pET41a: <i>tse8</i> -HA as template; use with primer <i>gatC</i> -HA-Strep <sup>R</sup> |
| OAL3301 | <i>tsi8</i> -V5_F       | CCGCCTCTAGATA<br>ACAGGAGGAATT                                                          | Generate <i>tsi8</i> with C-terminal V5 tag ( <i>Xba</i> I site and Shine-Dalgarno)                                                                                      |

|         |                         |                                                                                                                                                 |                                                                                                                                           |
|---------|-------------------------|-------------------------------------------------------------------------------------------------------------------------------------------------|-------------------------------------------------------------------------------------------------------------------------------------------|
|         |                         | AACCATGCAGCG<br>ACTCTTCGTCTAC                                                                                                                   |                                                                                                                                           |
| OAL5164 | <i>gatA</i> -V5-Strep_F | GAGCTCATGCTGC<br>ATCAATTGACCCT<br>CGCCGAGA                                                                                                      | Generate <i>gatA</i> with C-terminal V5 and Strep tags ( <i>SacI</i> site) with pET28a: <i>gatA</i> -V5 as template                       |
| OAL5137 | <i>gatA</i> -V5-Strep_R | TCTAGATCACTTT<br>TCGAACTGCGGG<br>TGGCTCCACGTAG<br>AATCGAGACCGA<br>GGA                                                                           | Generate <i>gatA</i> with C-terminal V5 and Strep tags ( <i>XbaI</i> site) with pET28a: <i>gatA</i> -V5 as template                       |
| OAL3302 | <i>tsi8</i> -V5_R       | TCTACGCCCTGCG<br>CGACGGTAAGCC<br>TATCCCTAACCCCT<br>CTCCTCGGTCTCG<br>ATTCTACGGGTAA<br>GCCTATCCCTAAC<br>CCTCTCCTCGGTC<br>TCGATTCTACGTG<br>ACTGCAG | Generate <i>tsi8</i> with C-terminal V5V5 tag ( <i>PstI</i> site)                                                                         |
| OAL3273 | <i>gatA</i> -V5_F       | CCGGCCTCGAGT<br>AACAGGAGGAAT<br>TAACCATGCTGCA<br>TCAATTGACCCT                                                                                   | Generate <i>gatA</i> with C-terminal V5 tag ( <i>XhoI</i> site and Shine-Dalgarno)                                                        |
| OAL3274 | <i>gatA</i> -V5_R       | CCGGGATGCATTT<br>ACGTAGAATCGA<br>GACCGAGGAGAG<br>GGTTAGGGATAG<br>GCTTACCGAAGC<br>CGGCCGGGTGC<br>G                                               | Generate <i>gatA</i> with C-terminal V5 tag ( <i>NsiI</i> site)                                                                           |
| OAL3275 | <i>gatB</i> _F          | GCGCGGGATCCG<br>CAATGGGAAACC<br>GTGATC                                                                                                          | Generate <i>gatB</i> with N-terminal His tag ( <i>BamHI</i> site)                                                                         |
| OAL3276 | <i>gatB</i> _R          | AAGCTTTCACGCT<br>TCGAGCTTTTT                                                                                                                    | Generate <i>gatB</i> with N-terminal His tag ( <i>HindIII</i> site)                                                                       |
| OAL3277 | <i>gatC</i> -HA_F       | CATATGGCGCTTG<br>AACGCTCCGAC                                                                                                                    | Generate <i>gatA</i> with C-terminal HA tag ( <i>NdeI</i> site)                                                                           |
| OAL3278 | <i>gatC</i> -HA_R       | AATTACTCGAGTC<br>AGCACGCGTAGT<br>CCGACACGTCGT<br>ACGGGTATGACT<br>CGATGACTTTCGG                                                                  | Generate <i>gatA</i> with C-terminal HA tag ( <i>XhoI</i> site)                                                                           |
| OAL5138 | <i>gatC</i> -HA-Strep_F | GCGCGAGCTCAT<br>GGCGCTTGAACG<br>CTCCGACGTGGA<br>AAAAAT                                                                                          | Generate <i>gatC</i> with C-terminal HA-Strep tag ( <i>SacI</i> site) with pET28a: <i>gatC</i> -HA as template                            |
| OAL5139 | <i>gatC</i> -HA-Strep_R | TCTAGATCACTTT<br>TCGAACTGCGGG<br>TGGCTCCAGCAC<br>GCGTAGTCCGGC<br>ACGT                                                                           | Generate <i>gatC</i> with C-terminal HA-Strep tag ( <i>XbaI</i> site) with pET28a: <i>gatC</i> -HA as template                            |
| OAL3913 | <i>asnS</i> -His_F      | GCGCGCTGCAGT<br>AACAGGAGGAAT<br>TAACCATGAGCG<br>TTGTGCCTGTAGC<br>CGA                                                                            | Generate <i>asnS</i> (asparagine tRNA synthase from <i>E. coli</i> MG1655) with C-terminal His tag ( <i>SpeI</i> site and Shine-Dalgarno) |
| OAL3914 | <i>asnS</i> -His_R      | GGCGCACTAGTTT<br>AGTGATGGTGAT<br>GGTGATGGAAGC                                                                                                   | Generate <i>asnS</i> (asparagine tRNA synthase from <i>E. coli</i> MG1655) with C-terminal His tag ( <i>NotI</i> site)                    |

|  |  |                   |  |
|--|--|-------------------|--|
|  |  | TGGCGTTACGCG<br>G |  |
|--|--|-------------------|--|

814

## 815 Extended Data Figures and Figure Legends

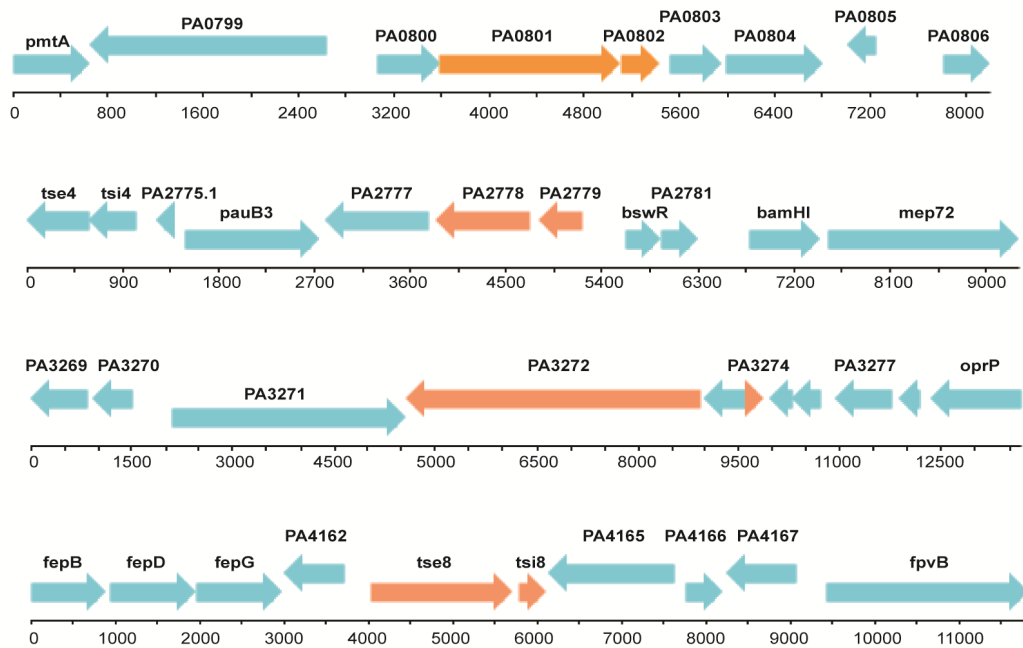

816

## 817 Extended Data Figure 1 | Genomic context of putative novel toxin-immunity pairs

818 identified in TraDIS screen. Putative toxin and immunity pairs from Table 1 are in orange

819 with surrounding genes in blue. Genes corresponding to PAO1 ORF numbers. Base pairs

820 covering the region are marked below each gene sequence.

821



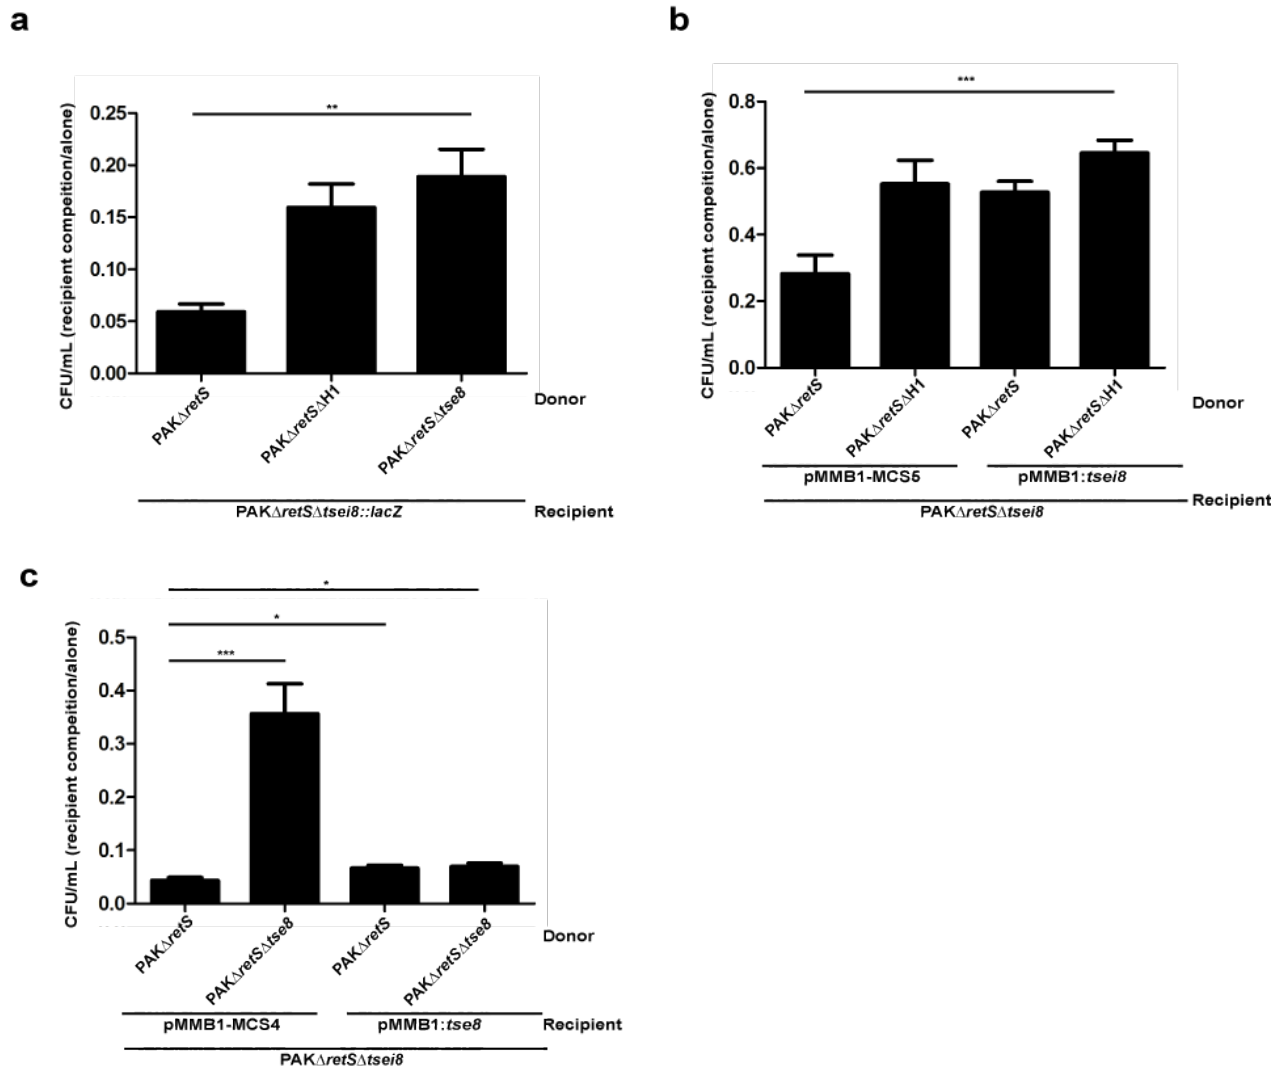

822

823 **Extended Data Figure 2 | Prey killing is mediated by Tse8 and effects can be**  
 824 **complemented by expressing Tse8 or Tsei8 *in trans*.** **a**, In the absence of Tse8  
 825 (PAK $\Delta$ retS $\Delta$ tse8) or the H1-T6SS (PAK $\Delta$ retS $\Delta$ H1) there is no reduction in recovered recipient  
 826 (PAK $\Delta$ retS $\Delta$ tse8) as occurs when the donor has a fully active T6SS (PAK $\Delta$ retS). **b-c**, The  
 827 PAK $\Delta$ retS $\Delta$ tse8 (**b**) or PAK $\Delta$ retS $\Delta$ tse8 (**c**) mutation can be complemented *in trans*.  
 828 Competition assays were performed with donors PAK $\Delta$ retS or PAK $\Delta$ retS $\Delta$ H1 and recipient  
 829 PAK $\Delta$ retS $\Delta$ tse8 with either empty pBBR1MCS5 or the complementation vector pBBR1:tse8  
 830 (**b**) or recipient PAK $\Delta$ retS $\Delta$ tse8 with either empty pBBR1MCS4 or the complementation  
 831 vector pBBR1:tse8 (**c**).

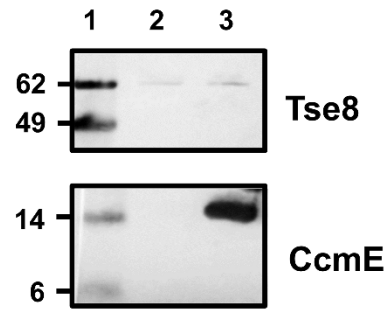

**Lane 1:** molecular weight standards

**Lane 2:** Tse8

**Lane 3:** Tse8+CcmE

832

833 **Extended Data Figure 3 | The interaction of Tse8 with Tsi8 or GatCAB is specific.** Tse8-

834 HA-Strep does not bind non-specifically to the His-Tag Dynabeads used in the pull-down

835 experiments in Fig. 2f and 4a and does not interact with the non-specific binding control protein

836 (CcmE-His). Tse8-HA-Strep was added to the His-Tag Dynabeads and to the CcmE-His protein

837 solution in the same molar excess as used in the experiments shown in Fig. 2f and 4a.

838 Negligible amounts of Tse8-HA-Strep can be detected in both conditions.

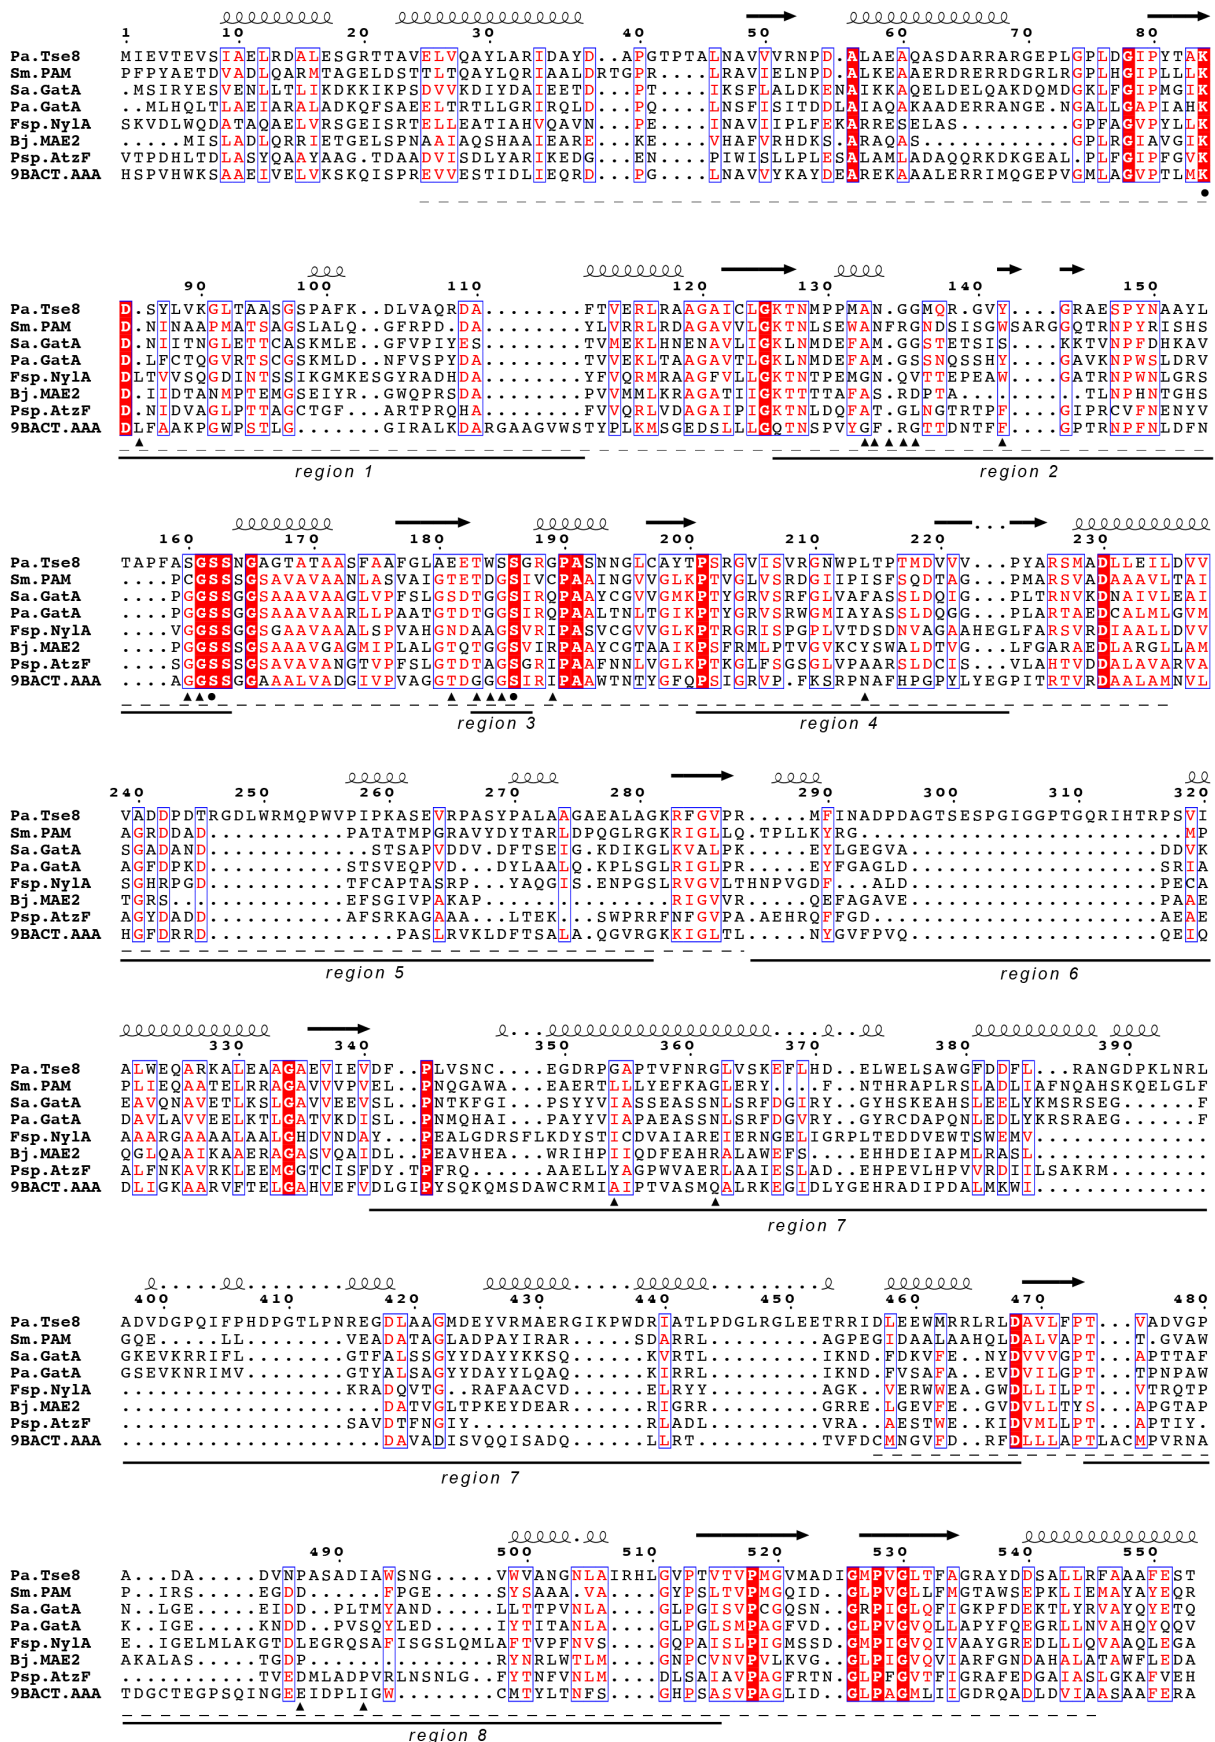

840 **Extended Data Figure 4 | Sequence alignment of Tse8 with predicted homologs of known**

841 **3D structure.** Amino acid sequences from *P. aeruginosa* Tse8 (*Pa.Tse8*), the  
842 *Stenotrophomonas maltophilia* Peptide amidase (*Sm.Pam*), the *Staphylococcus aureus* Gln-  
843 tRNA(Gln) amidotransferase subunit A (*Sa.GatA*), the *P. aeruginosa* Asn-tRNA(Asn)  
844 transamidosome subunit A (*Pa.GatA*), the *Flavobacterium sp.* 6-aminohexanoate cyclic dimer  
845 hydrolase NylA (*Fsp.NylA*), the *Bradyrhizobium japonicum* malonamidase E2 (*Bj.MAE2*), the  
846 *Pseudomonas sp.* allophanate hydrolase (*Psp.AtzF*) and the *Bacterium csbl00001* Aryl  
847 Acylamidase (*9BACT.AAA*) were aligned. Residues are color-coded depending on the  
848 percentage of equivalences; white letter in red background for residue 100 % conserved, red  
849 letter in white background for residue with physical-chemical properties conserved. The  
850 secondary structure elements found in the 3D structure of *Sm.PAM* are represented above the  
851 alignment (black arrows correspond to  $\beta$ -sheets and curly lines to  $\alpha$ -helices). The conserved  
852 Ser-Ser-Lys catalytic triad is indicated below the alignment by black dots. The AS signature  
853 sequence is indicated below the alignment by a dotted line. Regions that protrude out of the  
854 core AS domain are numbered below the alignment. Residues found to interact with  
855 substrates/substrate analogues, products or inhibitors are indicated with black triangles below  
856 the alignment (analysis carried out for crystal structures with the following PDB codes: 1M21  
857 (*Sm.Pam*), 1O9O (*Bj.MAE2*), 4CP8 (*Psp.AtzF*) and 4YJI (*9BACT.AAA*)). Alignment was  
858 generated with MUSCLE<sup>60</sup> and graphical representation with ESPript 3<sup>61</sup>.

859

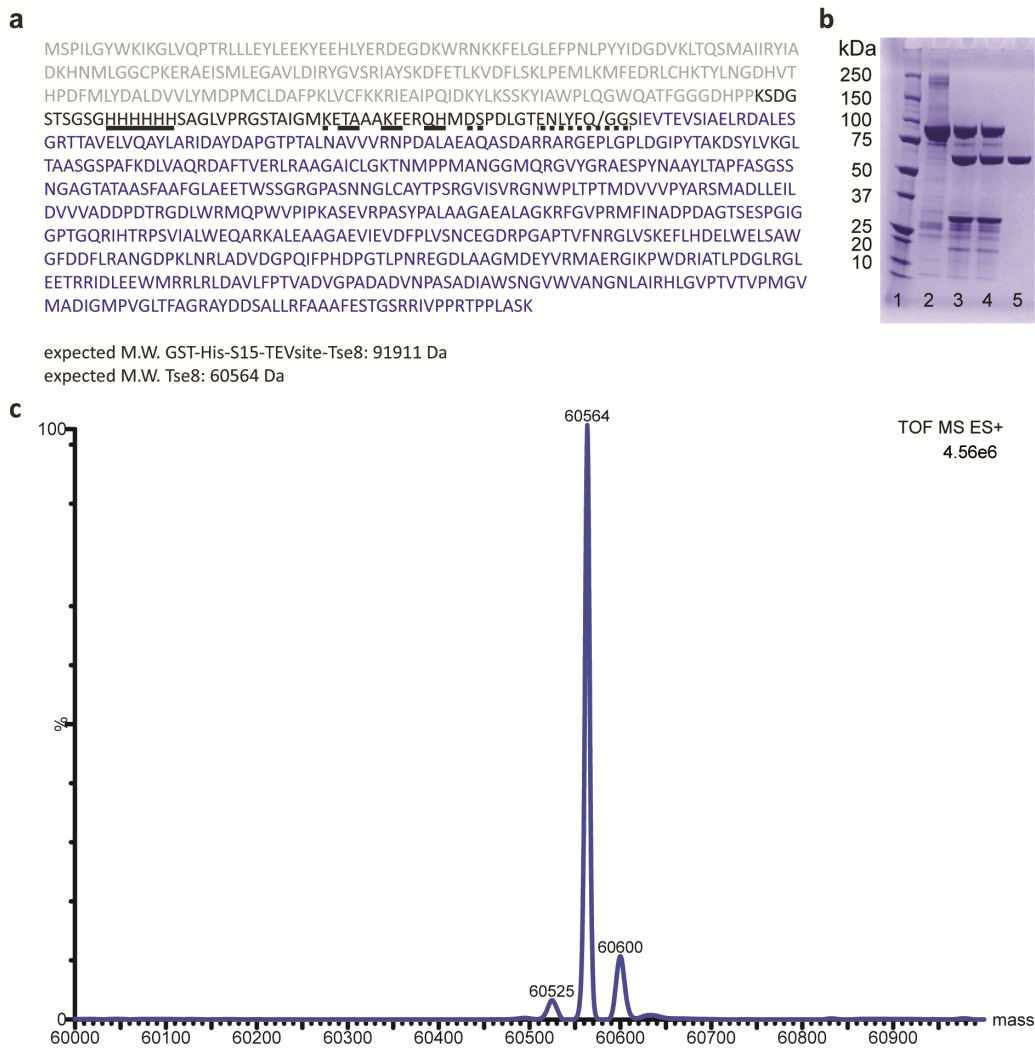

860

861 **Extended Data Figure 5 | Recombinant production of Tse8.** **a**, Amino acid sequence of  
 862 *Pseudomonas aeruginosa* GST-TEV-Tse8 construct. The recombinant Tse8 construct contains  
 863 a fused glutathione S-transferase (GST) tag (grey colour), a S15 tag (dashed line), a poly-  
 864 histidine tag (smooth line) and the optimal Tobacco Etch Virus protease (TEV) cleavage site  
 865 (ENLYFQG) (dotted line) at the N-terminus of Tse8 (in blue letters). **b**, Sodium dodecyl sulfate  
 866 polyacrylamide gel electrophoresis (SDS-PAGE) of purified Tse8. Lane 1, molecular weight  
 867 marker; Lane 2, sample before cleaving with TEV; Lanes 3-4, sample after incubation with  
 868 TEV; Lane 5, Tse8 without tags (4-20% gel (ExpressPlus™ PAGE Gel, GenScript). **c**,  
 869 Deconvoluted electrospray ionization mass spectrometry (ESI-MS) chromatogram of purified

870 Tse8 after TEV cleavage (the experimentally determined molecular weight corresponds to the  
871 expected molecular weight of 60,564 Da).

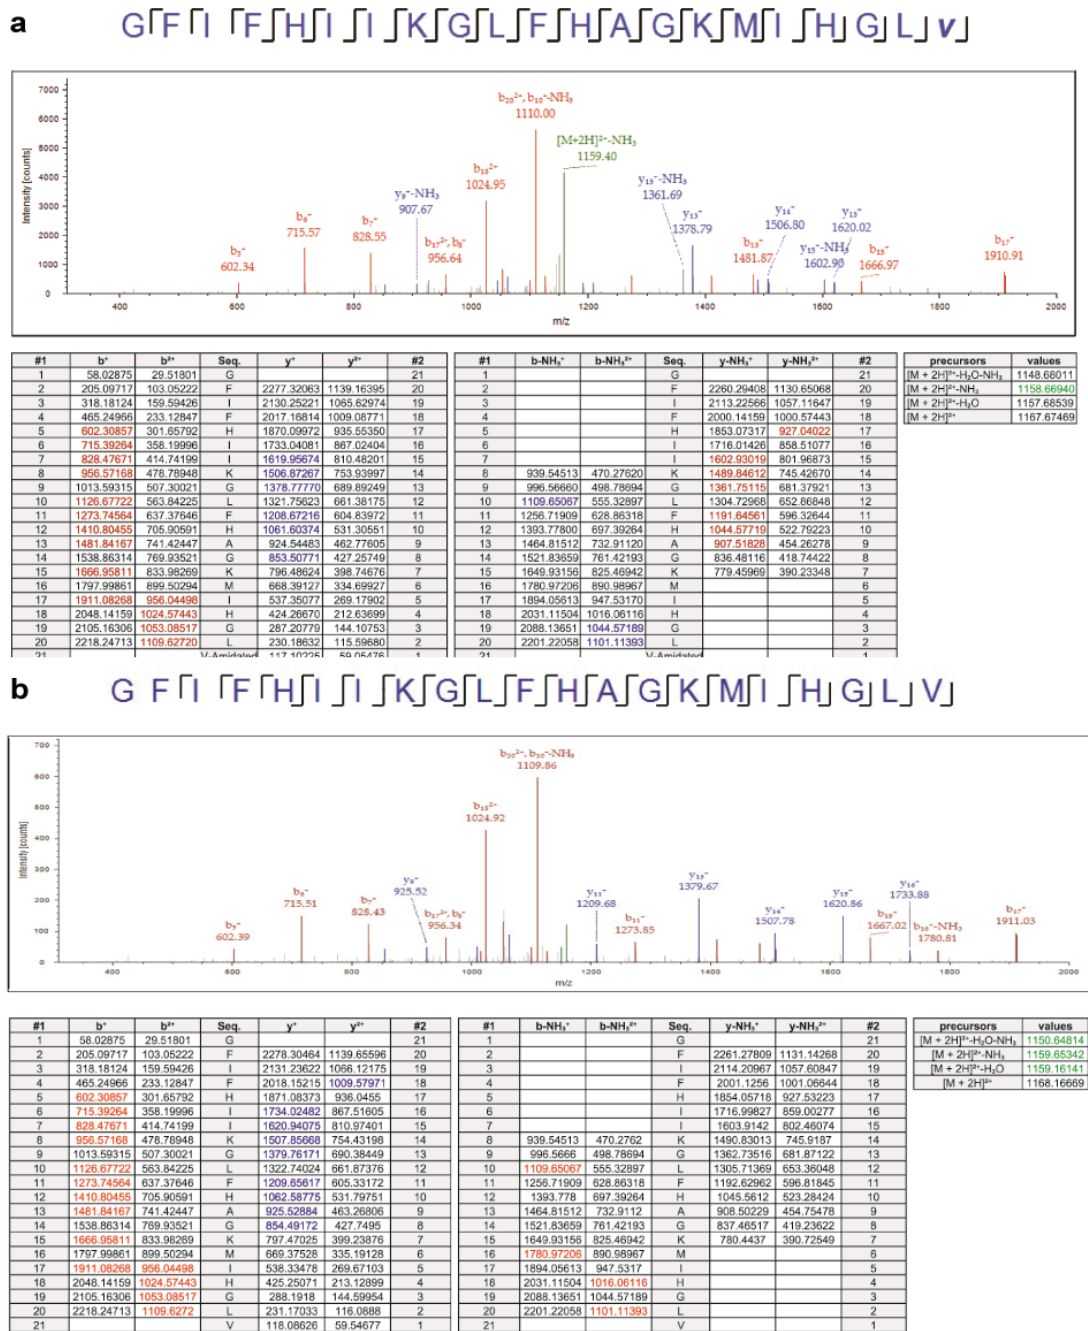

872

873 **Extended Data Figure 6 | Tse8 is not active on a substrate of the amidase Pam. a-b, MS**

874 analysis of Tse8 (a) or Pam (b) enzymatic assay using epinecidin-1 as substrate. The

875 antimicrobial peptide epinecidin-1, as well as sermorelin, have amidated C termini. The latter

876 has previously been used to measure the amidase activity of Pam from *S. maltophilia*<sup>50</sup>. Top

877 panel in both (a) and (b): Sequence covered by the fragments obtained after fragmentation of

878 epinecidin-1 in the MS is indicated above the fragmentation spectra for epinecidin-1. Signals

879 corresponding to the amidated **(a)** or deamidated **(b)** form of epinecidin-1 are shown in the  
880 spectral plot with red ions belonging to the *b* series of fragments, blue ions to the *y* series, and  
881 green ions to parental forms of the peptide. Lower panel in both **(a)** and **(b)**: Correspondence  
882 between the observed fragments and their theoretical masses. Tables correspond to unaltered  
883 ion series at +1 and +2 charge states (left), ion series after neutral losses at +1 and +2 charge  
884 states (ammonia loss, centre) and parental ion masses at +2 charge state with or without diverse  
885 neutral losses (right).



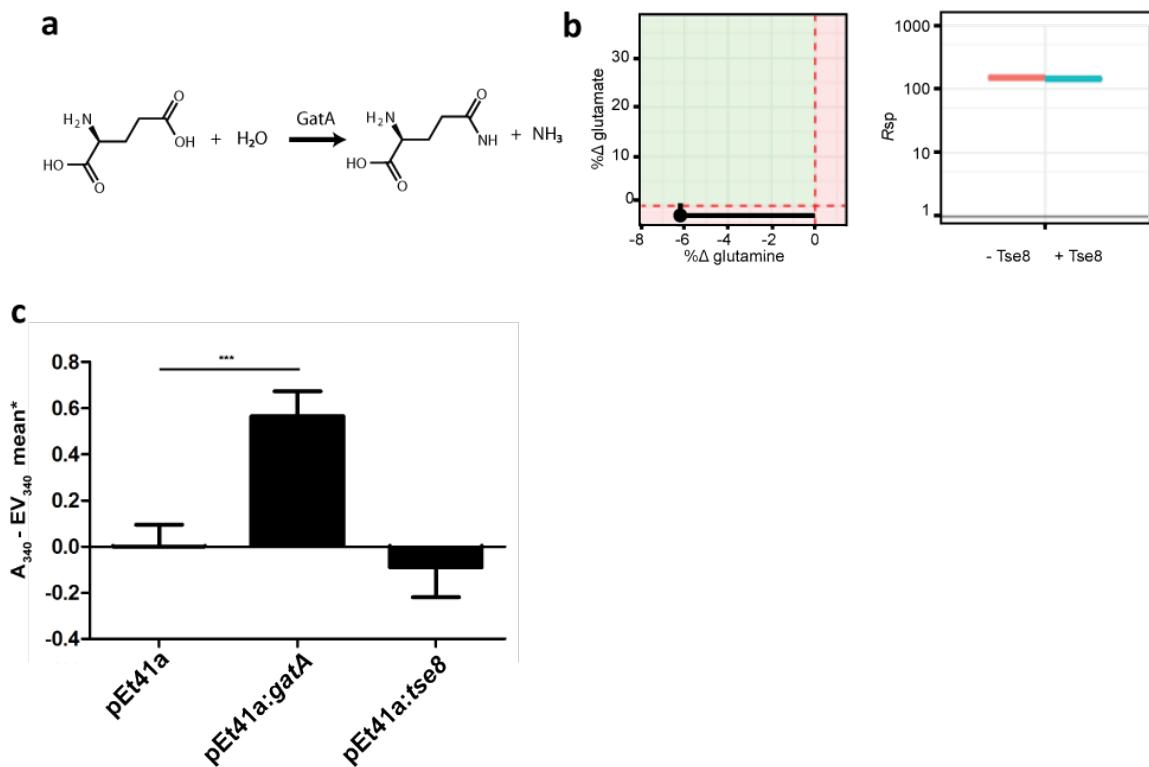

886

887 **Extended Data Figure 7 | Tse8 is not active on a substrate of GatA. a**, Amidase reaction

888 catalyzed by GatA and **b**, MS analysis of Tse8 enzymatic assay using glutamine as substrate.

889 Signal of the expected product (glutamate) was also found as a contaminant in the blank and

890 product stock and therefore subtracted from the reaction incubation. The graph on the left

891 shows relative differences (%Δ) of glutamate and glutamine in reaction incubation and blank

892 samples. The green-shaded area indicates the zone in which the observed differences could

893 indicate enzymatic reaction. ( $\% \Delta_{\text{Product}} = 100 * ([\text{product in incubation}] - [\text{product in blank}] /$

894  $[\text{product in incubation}]; \% \Delta_{\text{Substrate}} = 100 * ([\text{substrate in incubation}] - [\text{substrate in blank}] /$

895  $[\text{substrate in incubation}])$ . The graph on the right shows the ratios between substrate and

896 product ( $R_{\text{sp}}$ ) in the blank (red) and reaction (Tse8) incubation (blue) samples. The product

897 signal (contaminant) was *ca.* 100 times lower than that of the substrate. ( $R_{\text{sp}} = (\text{Signal substrate}$

898  $/ \text{Signal product})$ . **c**, Glutaminase assays of lysates of *E. coli* cells expressing GatA, Tse8 or

899 empty vector demonstrate that Tse8 does not have the same substrate (L-glutamine) as GatA

900 as measured by relative NADPH levels/(CFU/mL) (\* represented as empty vector (EV) mean  
901 subtracted from each mean sample).

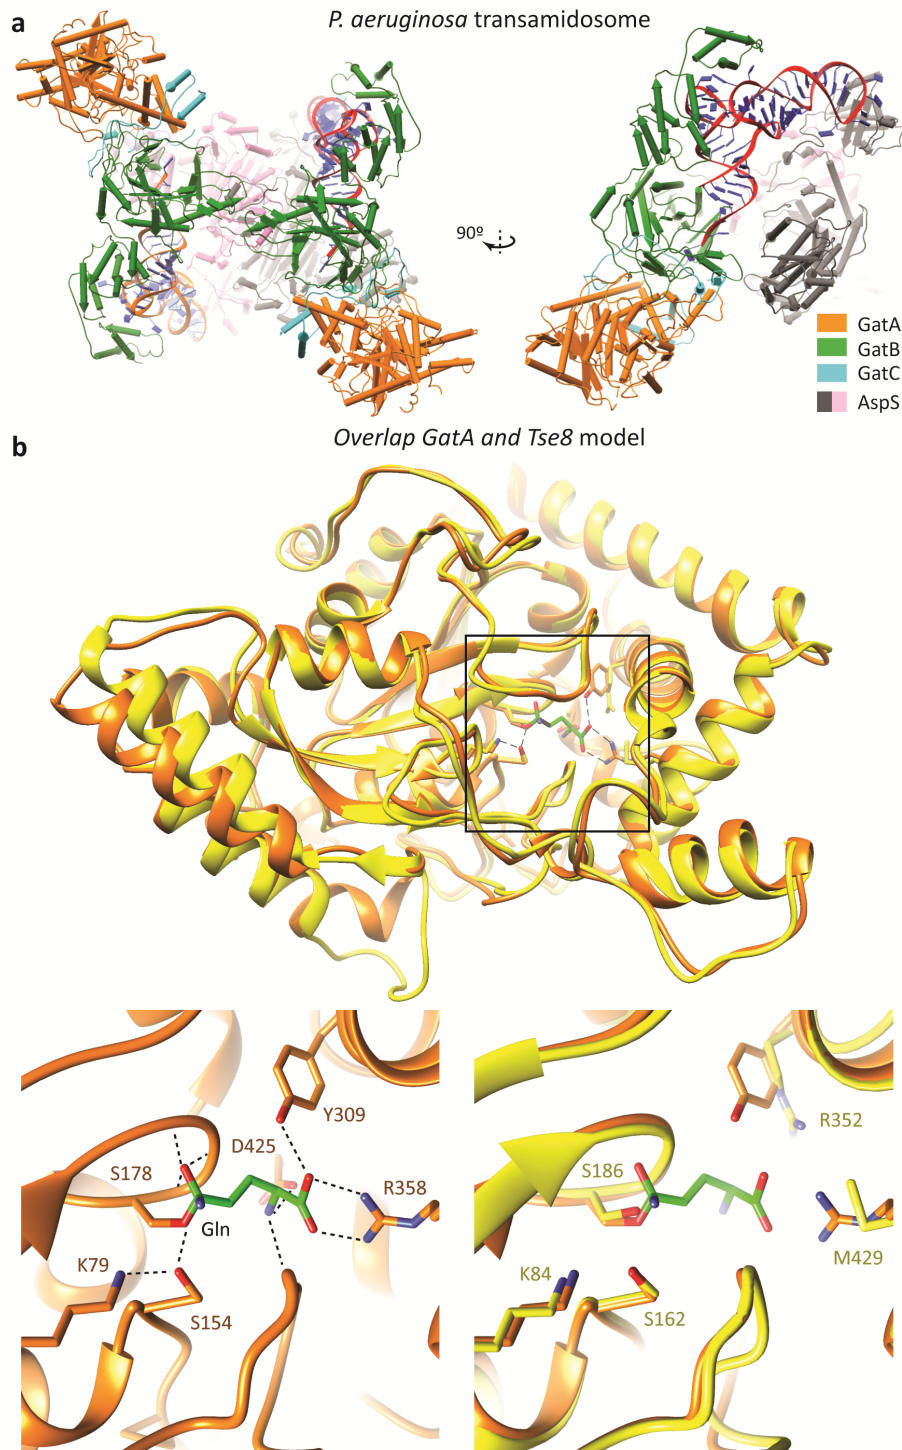

902

903 **Extended Data Figure 8 | Tse8 is structurally similar to GatA of the transamidosome**

904 **complex. a**, Structure of the *P. aeruginosa* GatCAB transamidosome-Asp-tRNA structure

905 (PDB: 4WJ3). . **b**, Top panel: Tse8 3D homology model generated using GatA from *S. aureus*

906 (from PDB: 2F2A) as template overlaid with the A subunit of the solved GatCAB

907 transamidosome-AspS-tRNA structure from *P. aeruginosa* (PDB: 4WJ3). The reaction centre  
908 with covalently bound glutamine substrate is boxed. Bottom panel: Close-up view of the  
909 reaction centre of *S. aureus* GatA (left) with glutamine (green) substrate bound and of a  
910 superposition of *S. aureus* GatA and the 3D homology model of *P. aeruginosa* Tse8 (right)  
911 showing the predicted conservation of the Ser-*cis*Ser-Lys catalytic triad and predicted  
912 divergent substrate binding residues in Tse8 compared to GatA.

913

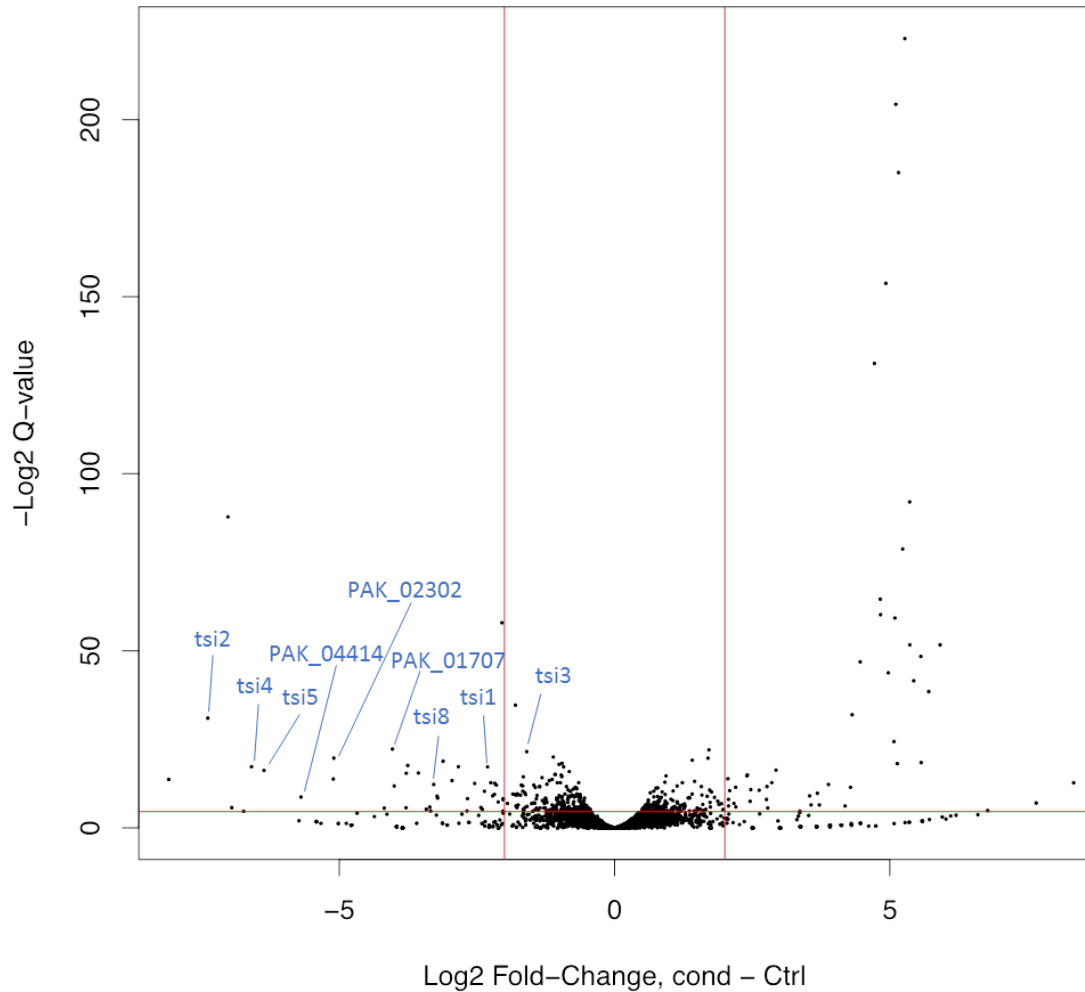

914

915 **Extended Figure 9.** Volcano plot showing the spread of changes in abundance of TraDIS  
916 mutants for each *P. aeruginosa* gene during T6SS active compared to inactive conditions. Each  
917 black dot represents the comparative fold change of insertions for each gene. Red lines show  
918 the cut off criteria of 5% false discovery rate (horizontal) and a  $\text{log}_2$  fold change ( $\text{Log}_2\text{FC}$ ) of  
919 2 (vertical). Immunity genes and putative immunity genes (as shown in Table 1) are shown in  
920 blue.
